# Supplementary material for: Cellular Consequences of Diminished Protein O-Mannosyltransferase Activity in Baker’s Yeast
Source: Int J Mol Sci. 2017 Jun 9;18(6):1226. doi: 10.3390/ijms18061226 (PMC5486049; doi:10.3390/ijms18061226)
Supplement: Supplementary file 1 [file ijms-18-01226-s001.xlsx]

## Sheet: Table S1
Table S1. List of ORFs referring to mutants analyzed for the sensitivity to PMT-inhibitor R3A-5a. Colony growth is indicated as growth area (in pixels) in the absence (-inhibitor) and presence (+inhibitor) of PMT-inhibitor. Growth upon PMT-inhibitor treatment was also expressed as a percantage of growth on media without drug.
Systematic name	Standard name	Growth –inhibitor	Growth +inhibitor	Growth [%] +inhibitor/-inhibitor	Library
YBR196C	PGI1	74	0	0	DAmP
YBR260C	RGD1	80	0	0	deletion
YCR009C	RVS161	67	0	0	deletion
YDL095W	PMT1	95	0	0	deletion
YDL096C	OPI6	106	0	0	deletion
YDR162C	NBP2	68	0	0	deletion
YFL032W	YFL032W	66	0	0	deletion
YGL012W	ERG4	78	0	0	deletion
YHR030C	SLT2	83	0	0	deletion
YHR079C	IRE1	97	0	0	deletion
YJL062W	LAS21	74	0	0	deletion
YJL095W	BCK1	98	0	0	deletion
YKL165C	MCD4	60	0	0	DAmP
YLR138W	NHA1	107	0	0	deletion
YLR331C	JIP3	61	0	0	deletion
YLR332W	MID2	71	0	0	deletion
YOR008C	WSC1	83	0	0	deletion
YOR242C	SSP2	65	0	0	deletion
YOR246C	ENV9	79	0	0	deletion
YPR095C	SYT1	64	0	0	deletion
YGR217W	CCH1	80	3	4	deletion
YAL023C	PMT2	76	3	4	deletion
YGR196C	FYV8	77	6	8	deletion
YDR525W	API2	78	8	10	deletion
YCR017C	CWH43	97	10	10	deletion
YKL190W	CNB1	79	9	11	deletion
YBR200W	BEM1	52	6	12	deletion
YDR395W	SXM1	86	10	12	deletion
YKL048C	ELM1	75	9	12	deletion
YJL091C	GWT1	109	15	14	DAmP
YLR295C	ATP14	83	12	14	deletion
YOR085W	OST3	83	12	14	deletion
YFL031W	HAC1	62	9	15	deletion
YBR196C-A	YBR196C-A	60	9	15	deletion
YGR166W	TRS65	100	15	15	deletion
YDR307W	PMT7	73	11	15	deletion
YHR142W	CHS7	86	13	15	deletion
YOR265W	RBL2	78	12	15	deletion
YGL084C	GUP1	51	8	16	deletion
YML013W	UBX2	76	12	16	deletion
YOR002W	ALG6	76	12	16	deletion
YNL089C	YNL089C	103	17	17	deletion
YER155C	BEM2	120	20	17	deletion
YLL028W	TPO1	77	13	17	deletion
YGR199W	PMT6	71	12	17	deletion
YBR023C	CHS3	94	16	17	deletion
YDR389W	SAC7	75	13	17	deletion
YDR524W-A	YDR524W-A	97	17	18	deletion
YJL140W	RPB4	51	9	18	deletion
YOR208W	PTP2	79	14	18	deletion
YKL019W	RAM2	106	19	18	DAmP
YDL203C	ACK1	105	19	18	deletion
YBR243C	ALG7	55	10	18	DAmP
YHL007C	STE20	99	18	18	deletion
YPL096C-A	ERI1	82	15	18	deletion
YPR133W-A	TOM5	98	18	18	deletion
YGL027C	CWH41	97	18	19	deletion
YGL149W	YGL149W	97	18	19	deletion
YKR094C	RPL40B	80	15	19	deletion
YAL013W	DEP1	63	12	19	deletion
YIL123W	SIM1	105	20	19	deletion
YBR229C	ROT2	83	16	19	deletion
YLR087C	CSF1	82	16	20	deletion
YJL038C	LOH1	75	15	20	deletion
YLR373C	VID22	59	12	20	deletion
YML057W	CMP2	108	22	20	deletion
YIR042C	YIR042C	72	15	21	deletion
YDR524C-B	YDR524C-B	105	22	21	deletion
YMR293C	HER2	61	13	21	deletion
YDR512C	EMI1	84	18	21	deletion
YDR524W-A	YDR524W-A	92	20	22	deletion
YPL182C	YPL182C	69	15	22	deletion
YHR206W	SKN7	87	19	22	deletion
YML073C	RPL6A	87	19	22	deletion
YLR055C	SPT8	73	16	22	deletion
YNL192W	CHS1	112	25	22	deletion
YJL174W	KRE9	67	15	22	DAmP
YDR127W	ARO1	80	18	23	deletion
YDR392W	SPT3	71	16	23	deletion
YLR249W	YEF3	101	23	23	DAmP
YDL002C	NHP10	109	25	23	deletion
YHR200W	RPN10	74	17	23	deletion
YDL017W	CDC7	112	26	23	DAmP
YLR292C	SEC72	112	26	23	deletion
YML012W	ERV25	86	20	23	deletion
YDR043C	NRG1	89	21	24	deletion
YDR302W	GPI11	89	21	24	DAmP
YJR022W	LSM8	93	22	24	DAmP
YEL002C	WBP1	76	18	24	DAmP
YOR231W	MKK1	76	18	24	deletion
YKL096C-B	YKL096C-B	96	23	24	deletion
YOR352W	TFB6	83	20	24	deletion
YDR372C	VPS74	90	22	24	deletion
YGL048C	RPT6	114	28	25	DAmP
YBL061C	SKT5	61	15	25	deletion
YFL025C	BST1	61	15	25	deletion
YLL021W	SPA2	150	37	25	deletion
YMR211W	DML1	101	25	25	DAmP
YAR008W	SEN34	108	27	25	DAmP
YPL144W	POC4	80	20	25	deletion
YPL181W	CTI6	68	17	25	deletion
YIL039W	TED1	83	21	25	deletion
YGL225W	VRG4	79	20	25	DAmP
YNL333W	SNZ2	71	18	25	deletion
YKL213C	DOA1	67	17	25	deletion
YBR167C	POP7	94	24	25.5319	DAmP
YFR012W	DCV1	58	15	25.8621	deletion
YBL083C	YBL083C	85	22	25.8824	deletion
YOL077C	BRX1	100	26	26	DAmP
YOR127W	RGA1	100	26	26	deletion
YAR002C-A	ERP1	73	19	26.0274	deletion
YLR378C	SEC61	73	19	26.0274	DAmP
YLR444C	YLR444C	107	28	26.1682	deletion
YBL094C	YBL094C	61	16	26.2295	deletion
YGL120C	PRP43	57	15	26.3158	DAmP
YBR196C-A	YBR196C-A	72	19	26.3889	deletion
YPL089C	RLM1	68	18	26.4706	deletion
YOR093C	YOR093C	83	22	26.506	deletion
YPL140C	MKK2	83	22	26.506	deletion
YFL047W	RGD2	83	22	26.506	deletion
YDR410C	STE14	79	21	26.5823	deletion
YDR524C-B	YDR524C-B	109	29	26.6055	deletion
YMR052W	FAR3	120	32	26.6667	deletion
YNR052C	POP2	30	8	26.6667	deletion
YJR054W	KCH1	82	22	26.8293	deletion
YPL139C	UME1	82	22	26.8293	deletion
YAR018C	KIN3	78	21	26.9231	deletion
YER116C	SLX8	89	24	26.9663	deletion
YLR088W	GAA1	59	16	27.1186	DAmP
YML115C	VAN1	99	27	27.2727	deletion
YDL147W	RPN5	117	32	27.3504	DAmP
YEL072W	RMD6	95	26	27.3684	deletion
YJR066W	TOR1	124	34	27.4194	deletion
YER056C-A	RPL34A	80	22	27.5	deletion
YMR149W	SWP1	109	30	27.5229	DAmP
YBR070C	ALG14	107	30	28.0374	DAmP
YDR434W	GPI17	107	30	28.0374	DAmP
YNL031C	HHT2	107	30	28.0374	deletion
YPL096C-A	ERI1	181	51	28.1768	deletion
YOR216C	RUD3	70	20	28.5714	deletion
YER117W	RPL23B	94	27	28.7234	deletion
YBL024W	NCL1	66	19	28.7879	deletion
YDR390C	UBA2	125	36	28.8	DAmP
YKL014C	URB1	128	37	28.9062	DAmP
YDR360W	OPI7	83	24	28.9157	deletion
YNL304W	YPT11	93	27	29.0323	deletion
YDL235C	YPD1	117	34	29.0598	DAmP
YMR015C	ERG5	86	25	29.0698	deletion
YHR005C	GPA1	86	25	29.0698	deletion
YDR349C	YPS7	82	24	29.2683	deletion
YNL171C	YNL171C	58	17	29.3103	deletion
YOL046C	YOL046C	75	22	29.3333	deletion
YBR015C	MNN2	92	27	29.3478	deletion
YMR235C	RNA1	109	32	29.3578	DAmP
YKR083C	DAD2	143	42	29.3706	DAmP
YBL035C	POL12	119	35	29.4118	DAmP
YDL097C	RPN6	102	30	29.4118	DAmP
YMR159C	ATG16	112	33	29.4643	deletion
YNL038W	GPI15	122	36	29.5082	DAmP
YEL042W	GDA1	98	29	29.5918	deletion
YOR110W	TFC7	118	35	29.661	DAmP
YEL003W	GIM4	64	19	29.6875	deletion
YOL045W	PSK2	74	22	29.7297	deletion
YMR052C-A	YMR052C-A	121	36	29.7521	deletion
YOL026C	MIM1	84	25	29.7619	DAmP
YDR479C	PEX29	84	25	29.7619	deletion
YGL116W	CDC20	131	39	29.771	DAmP
YDR384C	ATO3	97	29	29.8969	deletion
YMR042W	ARG80	90	27	30	deletion
YNL325C	FIG4	90	27	30	deletion
YNL197C	WHI3	83	25	30.1205	deletion
YJR104C	SOD1	136	41	30.1471	deletion
YLR350W	ORM2	86	26	30.2326	deletion
YHR078W	YHR078W	99	30	30.303	deletion
YDR301W	CFT1	99	30	30.303	DAmP
YML019W	OST6	102	31	30.3922	deletion
YOL115W	PAP2	102	31	30.3922	deletion
YLR195C	NMT1	128	39	30.4688	DAmP
YLR443W	ECM7	105	32	30.4762	deletion
YPL127C	HHO1	105	32	30.4762	deletion
YKL193C	SDS22	59	18	30.5085	DAmP
YHR038W	RRF1	95	29	30.5263	deletion
YPL143W	RPL33A	85	26	30.5882	DAmP
YER164W	CHD1	134	41	30.597	deletion
YNL324W	YNL324W	98	30	30.6122	deletion
YIL062C	ARC15	98	30	30.6122	DAmP
YBR087W	RFC5	88	27	30.6818	DAmP
YDL153C	SAS10	88	27	30.6818	DAmP
YMR013W-A	YMR013W-A	104	32	30.7692	deletion
YKL173W	SNU114	117	36	30.7692	DAmP
YAL066W	YAL066W	107	33	30.8411	deletion
YOR117W	RPT5	68	21	30.8824	DAmP
YPR086W	SUA7	97	30	30.9278	DAmP
YOR019W	YOR019W	103	32	31.068	deletion
YFR024C-A	LSB3	90	28	31.1111	deletion
YBL082C	ALG3	77	24	31.1688	deletion
YPL038W-A	YPL038W-A	128	40	31.25	deletion
YGL040C	HEM2	112	35	31.25	DAmP
YLR386W	VAC14	83	26	31.3253	deletion
YOR336W	KRE5	67	21	31.3433	DAmP
YER143W	DDI1	118	37	31.3559	deletion
YPL202C	AFT2	89	28	31.4607	deletion
YOL024W	YOL024W	95	30	31.5789	deletion
YPR052C	NHP6A	76	24	31.5789	deletion
YDR369C	XRS2	76	24	31.5789	deletion
YFL013C	IES1	136	43	31.6176	deletion
YNL289W	PCL1	79	25	31.6456	deletion
YNL276C	YNL276C	120	38	31.6667	deletion
YML046W	PRP39	101	32	31.6832	DAmP
YOL019W-A	YOL019W-A	132	42	31.8182	deletion
YAL067C	SEO1	110	35	31.8182	deletion
YER118C	SHO1	110	35	31.8182	deletion
YNL253W	TEX1	88	28	31.8182	deletion
YLL046C	RNP1	113	36	31.8584	deletion
YMR198W	CIK1	69	22	31.8841	deletion
YAL062W	GDH3	119	38	31.9328	deletion
YIL026C	IRR1	100	32	32	DAmP
YGR273C	YGR273C	128	41	32.0312	deletion
YDR224C	HTB1	128	41	32.0312	DAmP
YOR115C	TRS33	84	27	32.1429	deletion
YGL007C-A	YGL007C-A	87	28	32.1839	deletion
YPL124W	SPC29	59	19	32.2034	DAmP
YMR094W	CTF13	90	29	32.2222	DAmP
YOR092W	ECM3	90	29	32.2222	deletion
YOR091W	TMA46	93	30	32.2581	deletion
YGL011C	SCL1	99	32	32.3232	DAmP
YML064C	TEM1	99	32	32.3232	DAmP
YGL047W	ALG13	102	33	32.3529	DAmP
YDR120C	TRM1	71	23	32.3944	deletion
YLR431C	ATG23	188	61	32.4468	deletion
YBR011C	IPP1	77	25	32.4675	DAmP
YMR295C	YMR295C	80	26	32.5	deletion
YDR385W	EFT2	80	26	32.5	deletion
YNL262W	POL2	80	26	32.5	DAmP
YDR243C	PRP28	123	40	32.5203	DAmP
YBR190W	YBR190W	83	27	32.5301	DAmP
YHR197W	RIX1	86	28	32.5581	DAmP
YML018C	YML018C	89	29	32.5843	deletion
YHR114W	BZZ1	89	29	32.5843	deletion
YJL081C	ARP4	92	30	32.6087	DAmP
YDL148C	NOP14	95	31	32.6316	DAmP
YML005W	TRM12	95	31	32.6316	deletion
YJL195C	YJL195C	104	34	32.6923	DAmP
YDR239C	YDR239C	107	35	32.7103	deletion
YMR175W	SIP18	107	35	32.7103	deletion
YBR254C	TRS20	107	35	32.7103	DAmP
YAL065C	YAL065C	110	36	32.7273	deletion
YLL045C	RPL8B	110	36	32.7273	deletion
YER161C	SPT2	116	38	32.7586	deletion
YJL077W-B	YJL077W-B	128	42	32.8125	deletion
YNR030W	ALG12	128	42	32.8125	deletion
YPR159W	KRE6	64	21	32.8125	deletion
YPL174C	NIP100	70	23	32.8571	deletion
YNL090W	RHO2	73	24	32.8767	deletion
YOR038C	HIR2	76	25	32.8947	deletion
YML095C-A	YML095C-A	76	25	32.8947	deletion
YPL099C	INA17	85	28	32.9412	deletion
YLL058W	YLL058W	88	29	32.9545	deletion
YDR348C	PAL1	91	30	32.967	deletion
YLR121C	YPS3	91	30	32.967	deletion
YHR048W	YHK8	94	31	32.9787	deletion
YOR079C	ATX2	97	32	32.9897	deletion
YDR100W	TVP15	100	33	33	deletion
YGR211W	ZPR1	100	33	33	DAmP
YBL008W-A	YBL008W-A	112	37	33.0357	deletion
YNL275W	BOR1	115	38	33.0435	deletion
YBL084C	CDC27	118	39	33.0508	DAmP
YDR381W	YRA1	127	42	33.0709	DAmP
YGR291C	YGR291C	139	46	33.0935	deletion
YGR160W	YGR160W	57	19	33.3333	deletion
YLR122C	YLR122C	93	31	33.3333	deletion
YBL029C-A	YBL029C-A	123	41	33.3333	deletion
YPL152W-A	YPL152W-A	141	47	33.3333	deletion
YNL271C	BNI1	114	38	33.3333	deletion
YAL021C	CCR4	45	15	33.3333	deletion
YNL112W	DBP2	117	39	33.3333	DAmP
YNL116W	DMA2	78	26	33.3333	deletion
YDR367W	KEI1	111	37	33.3333	DAmP
YPL098C	MGR2	87	29	33.3333	deletion
YBR276C	PPS1	102	34	33.3333	deletion
YBR267W	REI1	18	6	33.3333	deletion
YBR111W-A	SUS1	108	36	33.3333	deletion
YMR269W	TMA23	93	31	33.3333	deletion
YLR423C	ATG17	131	44	33.5878	deletion
YNL269W	BSC4	119	40	33.6134	deletion
YBL074C	AAR2	116	39	33.6207	DAmP
YJR145C	RPS4A	110	37	33.6364	deletion
YMR136W	GAT2	104	35	33.6538	deletion
YGR163W	GTR2	104	35	33.6538	deletion
YML091C	RPM2	104	35	33.6538	DAmP
YLL023C	POM33	89	30	33.7079	deletion
YGR026W	YGR026W	86	29	33.7209	deletion
YGL008C	PMA1	86	29	33.7209	DAmP
YML016C	PPZ1	86	29	33.7209	deletion
YDR388W	RVS167	86	29	33.7209	deletion
YMR039C	SUB1	83	28	33.7349	deletion
YEL040W	UTR2	83	28	33.7349	deletion
YOL098C	YOL098C	163	55	33.7423	deletion
YGL002W	ERP6	80	27	33.75	deletion
YLR248W	RCK2	77	26	33.7662	deletion
YER021W	RPN3	74	25	33.7838	DAmP
YLR022C	SDO1	118	40	33.8983	DAmP
YDR398W	UTP5	115	39	33.913	DAmP
YGR159C	NSR1	56	19	33.9286	deletion
YAL019W	FUN30	97	33	34.0206	deletion
YMR297W	PRC1	94	32	34.0426	deletion
YPL215W	CBP3	91	31	34.0659	deletion
YDR257C	RKM4	91	31	34.0659	deletion
YLR124W	YLR124W	88	30	34.0909	deletion
YLR117C	CLF1	85	29	34.1176	DAmP
YER087W	AIM10	82	28	34.1463	deletion
YBR195C	MSI1	82	28	34.1463	deletion
YDR303C	RSC3	82	28	34.1463	DAmP
YLL039C	UBI4	79	27	34.1772	deletion
YKR068C	BET3	117	40	34.188	DAmP
YMR294W-A	YMR294W-A	76	26	34.2105	deletion
YFL003C	MSH4	111	38	34.2342	deletion
YAL007C	ERP2	73	25	34.2466	deletion
YLL047W	YLL047W	108	37	34.2593	deletion
YCL023C	YCL023C	99	34	34.3434	deletion
YHL002W	HSE1	99	34	34.3434	deletion
YDL143W	CCT4	122	42	34.4262	DAmP
YML035C	AMD1	90	31	34.4444	deletion
YAR031W	PRM9	90	31	34.4444	deletion
YNL254C	RTC4	90	31	34.4444	deletion
YNL006W	LST8	119	41	34.4538	DAmP
YJL015C	YJL015C	116	40	34.4828	DAmP
YBR210W	ERV15	87	30	34.4828	deletion
YPL011C	TAF3	145	50	34.4828	DAmP
YBR082C	UBC4	87	30	34.4828	deletion
YDL159W-A	YDL159W-A	113	39	34.5133	deletion
YLR026C	SED5	113	39	34.5133	DAmP
YKL096C-B	YKL096C-B	81	28	34.5679	deletion
YPL244C	HUT1	104	36	34.6154	deletion
YFR052W	RPN12	104	36	34.6154	DAmP
YBR111W-A	SUS1	104	36	34.6154	deletion
YDL193W	NUS1	101	35	34.6535	DAmP
YGL004C	RPN14	75	26	34.6667	deletion
YNL258C	DSL1	98	34	34.6939	DAmP
YBR252W	DUT1	98	34	34.6939	DAmP
YGR276C	RNH70	121	42	34.7107	deletion
YOR380W	RDR1	95	33	34.7368	deletion
YOR095C	RKI1	118	41	34.7458	DAmP
YOL139C	CDC33	92	32	34.7826	DAmP
YKL060C	FBA1	92	32	34.7826	DAmP
YGR247W	CPD1	89	31	34.8315	deletion
YEL058W	PCM1	89	31	34.8315	DAmP
YBL050W	SEC17	132	46	34.8485	DAmP
YMR256C	COX7	109	38	34.8624	deletion
YNL014W	HEF3	109	38	34.8624	deletion
YOR316C-A	YOR316C-A	129	45	34.8837	deletion
YDR085C	AFR1	86	30	34.8837	deletion
YPL125W	KAP120	86	30	34.8837	deletion
YHR037W	PUT2	86	30	34.8837	deletion
YER149C	PEA2	149	52	34.8993	deletion
YJL074C	SMC3	106	37	34.9057	DAmP
YIL057C	RGI2	83	29	34.9398	deletion
YDL015C	TSC13	83	29	34.9398	DAmP
YDL055C	PSA1	80	28	35	DAmP
YGR271W	SLH1	100	35	35	deletion
YDR011W	SNQ2	80	28	35	deletion
YAL060W	BDH1	117	41	35.0427	deletion
YHR118C	ORC6	117	41	35.0427	DAmP
YER120W	SCS2	117	41	35.0427	deletion
YML093W	UTP14	117	41	35.0427	DAmP
YPL095C	EEB1	97	34	35.0515	deletion
YMR031C	EIS1	94	33	35.1064	deletion
YCL055W	KAR4	94	33	35.1064	deletion
YPL219W	PCL8	94	33	35.1064	deletion
YLR362W	STE11	94	33	35.1064	deletion
YAR035C-A	YAR035C-A	111	39	35.1351	deletion
YPL004C	LSP1	111	39	35.1351	deletion
YCR062W	YCR062W	91	32	35.1648	deletion
YNL011C	YNL011C	108	38	35.1852	deletion
YDR235W	PRP42	108	38	35.1852	DAmP
YKL180W	RPL17A	108	38	35.1852	DAmP
YDR088C	SLU7	108	38	35.1852	DAmP
YPL157W	TGS1	54	19	35.1852	deletion
YMR290C	HAS1	71	25	35.2113	DAmP
YEL031W	SPF1	71	25	35.2113	deletion
YHR210C	YHR210C	88	31	35.2273	deletion
YHR199C	AIM46	88	31	35.2273	deletion
YPL111W	CAR1	105	37	35.2381	deletion
YBR020W	GAL1	139	49	35.2518	deletion
YDR411C	DFM1	102	36	35.2941	deletion
YHR081W	LRP1	51	18	35.2941	deletion
YDL160C-A	MHF2	136	48	35.2941	deletion
YMR054W	STV1	102	36	35.2941	deletion
YML015C	TAF11	119	42	35.2941	DAmP
YDL159W-A	YDL159W-A	116	41	35.3448	deletion
YAL041W	CDC24	99	35	35.3535	DAmP
YBR001C	NTH2	99	35	35.3535	deletion
YHR097C	YHR097C	82	29	35.3659	deletion
YGL005C	COG7	82	29	35.3659	deletion
YFR009W	GCN20	82	29	35.3659	deletion
YLR335W	NUP2	82	29	35.3659	deletion
YER001W	MNN1	96	34	35.4167	deletion
YGR122C-A	YGR122C-A	127	45	35.4331	deletion
YOR114W	YOR114W	79	28	35.443	deletion
YMR226C	YMR226C	93	33	35.4839	deletion
YGL007C-A	YGL007C-A	93	33	35.4839	deletion
YOR207C	RET1	107	38	35.514	DAmP
YPR053C	YPR053C	76	27	35.5263	deletion
YHR087W	RTC3	76	27	35.5263	deletion
YDR002W	YRB1	90	32	35.5556	DAmP
YBR060C	ORC2	104	37	35.5769	DAmP
YBL062W	YBL062W	59	21	35.5932	deletion
YPR048W	TAH18	118	42	35.5932	DAmP
YPR045C	THP3	87	31	35.6322	deletion
YMR316C-B	YMR316C-B	129	46	35.6589	deletion
YDR069C	DOA4	70	25	35.7143	deletion
YMR011W	HXT2	98	35	35.7143	deletion
YDL240W	LRG1	84	30	35.7143	deletion
YMR274C	RCE1	84	30	35.7143	deletion
YHR029C	YHI9	84	30	35.7143	deletion
YNL270C	ALP1	109	39	35.7798	deletion
YMR171C	EAR1	95	34	35.7895	deletion
YFR027W	ECO1	95	34	35.7895	DAmP
YNL053W	MSG5	95	34	35.7895	deletion
YMR223W	UBP8	95	34	35.7895	deletion
YDR073W	SNF11	81	29	35.8025	deletion
YPL146C	NOP53	120	43	35.8333	DAmP
YMR001C	CDC5	145	52	35.8621	DAmP
YER019C-A	SBH2	92	33	35.8696	deletion
YDR487C	RIB3	103	37	35.9223	DAmP
YPL119C-A	YPL119C-A	128	46	35.9375	deletion
YHR062C	RPP1	89	32	35.9551	DAmP
YDR203W	YDR203W	75	27	36	deletion
YLR422W	YLR422W	125	45	36	deletion
YJR112W	NNF1	125	45	36	DAmP
YGL013C	PDR1	75	27	36	deletion
YNL097C	PHO23	75	27	36	deletion
YGL162W	SUT1	111	40	36.036	deletion
YBR180W	DTR1	86	31	36.0465	deletion
YOR324C	FRT1	86	31	36.0465	deletion
YMR148W	OSW5	86	31	36.0465	deletion
YNL283C	WSC2	86	31	36.0465	deletion
YMR040W	YET2	86	31	36.0465	deletion
YFR028C	CDC14	97	35	36.0825	DAmP
YOL028C	YAP7	97	35	36.0825	deletion
YDR331W	GPI8	133	48	36.0902	DAmP
YER163C	GCG1	119	43	36.1345	deletion
YAL031C	GIP4	83	30	36.1446	deletion
YER019W	ISC1	83	30	36.1446	deletion
YDR049W	VMS1	83	30	36.1446	deletion
YBL004W	UTP20	105	38	36.1905	DAmP
YAL067W-A	YAL067W-A	116	42	36.2069	deletion
YDR290W	YDR290W	69	25	36.2319	deletion
YOL004W	SIN3	69	25	36.2319	deletion
YGR206W	MVB12	80	29	36.25	deletion
YBR029C	CDS1	91	33	36.2637	DAmP
YDL195W	SEC31	91	33	36.2637	DAmP
YNL273W	TOF1	102	37	36.2745	deletion
YPL094C	SEC62	113	41	36.2832	DAmP
YBR283C	SSH1	113	41	36.2832	deletion
YGR185C	TYS1	113	41	36.2832	DAmP
YMR316W	DIA1	135	49	36.2963	deletion
YHR101C	BIG1	88	32	36.3636	DAmP
YNL136W	EAF7	66	24	36.3636	deletion
YLR436C	ECM30	88	32	36.3636	deletion
YOL025W	LAG2	88	32	36.3636	deletion
YPL159C	PET20	88	32	36.3636	deletion
YNL158W	PGA1	121	44	36.3636	DAmP
YER173W	RAD24	143	52	36.3636	deletion
YPL092W	SSU1	88	32	36.3636	deletion
YNL246W	VPS75	77	28	36.3636	deletion
YOR359W	VTS1	88	32	36.3636	deletion
YOL019W-A	YOL019W-A	129	47	36.4341	deletion
YEL041W	YEF1	96	35	36.4583	deletion
YHR080C	YHR080C	85	31	36.4706	deletion
YKR041W	YKR041W	85	31	36.4706	deletion
YNL054W	VAC7	74	27	36.4865	deletion
YOL164W-A	YOL164W-A	126	46	36.5079	deletion
YDL020C	RPN4	63	23	36.5079	deletion
YOR198C	BFR1	52	19	36.5385	deletion
YER073W	ALD5	93	34	36.5591	deletion
YLL060C	GTT2	93	34	36.5591	deletion
YDR528W	HLR1	93	34	36.5591	deletion
YLR435W	TSR2	93	34	36.5591	deletion
YMR238W	DFG5	82	30	36.5854	deletion
YOR032C	HMS1	82	30	36.5854	deletion
YDR464W	SPP41	112	41	36.6071	DAmP
YFR017C	IGD1	71	26	36.6197	deletion
YAR035C-A	YAR035C-A	101	37	36.6337	deletion
YDR141C	DOP1	101	37	36.6337	DAmP
YBL023C	MCM2	101	37	36.6337	DAmP
YAL046C	AIM1	90	33	36.6667	deletion
YHL040C	ARN1	90	33	36.6667	deletion
YPL230W	USV1	90	33	36.6667	deletion
YNL007C	SIS1	79	29	36.7089	DAmP
YAL005C	SSA1	79	29	36.7089	deletion
YMR282C	AEP2	98	36	36.7347	deletion
YMR185W	RTP1	98	36	36.7347	DAmP
YLR430W	SEN1	98	36	36.7347	DAmP
YLL020C	YLL020C	87	32	36.7816	deletion
YHR043C	DOG2	87	32	36.7816	deletion
YMR202W	ERG2	87	32	36.7816	deletion
YPL171C	OYE3	76	28	36.8421	deletion
YOR088W	YOR088W	103	38	36.8932	deletion
YMR013W-A	YMR013W-A	103	38	36.8932	deletion
YLR197W	NOP56	103	38	36.8932	DAmP
YOR307C	SLY41	103	38	36.8932	deletion
YLR027C	AAT2	65	24	36.9231	deletion
YLR079W	SIC1	65	24	36.9231	deletion
YHR036W	BRL1	111	41	36.9369	DAmP
YMR134W	ERG29	111	41	36.9369	DAmP
YAL068C	PAU8	111	41	36.9369	deletion
YIL065C	FIS1	92	34	36.9565	deletion
YPL096W	PNG1	92	34	36.9565	deletion
YOR346W	REV1	92	34	36.9565	deletion
YHR152W	SPO12	92	34	36.9565	deletion
YDR076W	RAD55	73	27	36.9863	deletion
YER125W	RSP5	127	47	37.0079	DAmP
YGL176C	YGL176C	108	40	37.037	deletion
YDR437W	GPI19	108	40	37.037	DAmP
YDR055W	PST1	81	30	37.037	deletion
YAL043C-a	YAL043C-a	81	30	37.037	deletion
YLR230W	YLR230W	116	43	37.069	DAmP
YHR065C	RRP3	116	43	37.069	DAmP
YML081W	TDA9	89	33	37.0787	deletion
YPL113C	YPL113C	97	36	37.1134	deletion
YER038W-A	YER038W-A	105	39	37.1429	deletion
YOR026W	BUB3	70	26	37.1429	deletion
YOR284W	HUA2	105	39	37.1429	deletion
YLL027W	ISA1	113	42	37.1681	deletion
YAR014C	BUD14	78	29	37.1795	deletion
YPL196W	OXR1	78	29	37.1795	deletion
YML007W	YAP1	78	29	37.1795	deletion
YJR141W	YJR141W	121	45	37.1901	DAmP
YNL039W	BDP1	121	45	37.1901	DAmP
YDR404C	RPB7	121	45	37.1901	DAmP
YEL025C	YEL025C	86	32	37.2093	deletion
YDR056C	YDR056C	86	32	37.2093	deletion
YMR041C	ARA2	86	32	37.2093	deletion
YMR147W	YMR147W	94	35	37.234	deletion
YHR198C	AIM18	94	35	37.234	deletion
YER005W	YND1	94	35	37.234	deletion
YMR254C	YMR254C	102	38	37.2549	deletion
YAL067W-A	YAL067W-A	102	38	37.2549	deletion
YHR086W-A	YHR086W-A	110	41	37.2727	deletion
YDR232W	HEM1	110	41	37.2727	DAmP
YMR288W	HSH155	110	41	37.2727	DAmP
YOR378W	AMF1	118	44	37.2881	deletion
YGL245W	GUS1	126	47	37.3016	DAmP
YMR182C	RGM1	75	28	37.3333	deletion
YNL338W	YNL338W	83	31	37.3494	deletion
YAL042W	ERV46	83	31	37.3494	deletion
YBR212W	NGR1	83	31	37.3494	deletion
YBR258C	SHG1	83	31	37.3494	deletion
YGR212W	SLI1	83	31	37.3494	deletion
YMR161W	HLJ1	91	34	37.3626	deletion
YER039C	HVG1	91	34	37.3626	deletion
YBR255W	MTC4	91	34	37.3626	deletion
YBR222C	PCS60	91	34	37.3626	deletion
YAL014C	SYN8	91	34	37.3626	deletion
YAL049C	AIM2	99	37	37.3737	deletion
YPL070W	MUK1	107	40	37.3832	deletion
YOR293C-A	YOR293C-A	224	84	37.5	deletion
YMR280C	CAT8	88	33	37.5	deletion
YNL232W	CSL4	88	33	37.5	DAmP
YPR082C	DIB1	88	33	37.5	DAmP
YPL075W	GCR1	120	45	37.5	DAmP
YOR044W	IRC23	88	33	37.5	deletion
YNL322C	KRE1	80	30	37.5	deletion
YBR057C	MUM2	88	33	37.5	deletion
YMR053C	STB2	112	42	37.5	deletion
YGR106C	VOA1	80	30	37.5	deletion
YBL029C-A	YBL029C-A	125	47	37.6	deletion
YER170W	ADK2	125	47	37.6	deletion
YHR022C-A	YHR022C-A	117	44	37.6068	deletion
YDR292C	SRP101	109	41	37.6147	DAmP
YNL079C	TPM1	93	35	37.6344	deletion
YML089C	YML089C	85	32	37.6471	deletion
YOR381W	FRE3	85	32	37.6471	deletion
YOR308C	SNU66	85	32	37.6471	deletion
YML122C	YML122C	77	29	37.6623	deletion
YJR084W	YJR084W	77	29	37.6623	deletion
YNL096C	RPS7B	77	29	37.6623	deletion
YPR173C	VPS4	69	26	37.6812	deletion
YOR376W-A	YOR376W-A	114	43	37.7193	deletion
YER004W	FMP52	90	34	37.7778	deletion
YGR083C	GCD2	90	34	37.7778	DAmP
YDR072C	IPT1	90	34	37.7778	deletion
YHR035W	NEL1	90	34	37.7778	deletion
YMR266W	RSN1	90	34	37.7778	deletion
YGR203W	YCH1	90	34	37.7778	deletion
YFR018C	YFR018C	74	28	37.8378	deletion
YOR189W	IES4	74	28	37.8378	deletion
YOR037W	CYC2	66	25	37.8788	deletion
YPL257W	YPL257W	95	36	37.8947	deletion
YNL290W	RFC3	124	47	37.9032	DAmP
YLR287-A	YLR287-A	58	22	37.931	deletion
YLL042C	ATG10	108	41	37.963	deletion
YLR243W	GPN3	108	41	37.963	DAmP
YBL081W	YBL081W	79	30	37.9747	deletion
YJL018W	YJL018W	79	30	37.9747	DAmP
YML004C	GLO1	79	30	37.9747	deletion
YHR121W	LSM12	79	30	37.9747	deletion
YER068W	MOT2	79	30	37.9747	deletion
YOR036W	PEP12	79	30	37.9747	deletion
YER051W	JHD1	100	38	38	deletion
YBL020W	RFT1	100	38	38	DAmP
YMR190C	SGS1	71	27	38.0282	deletion
YPL229W	YPL229W	92	35	38.0435	deletion
YJL032W	YJL032W	92	35	38.0435	DAmP
YEL071W	DLD3	92	35	38.0435	deletion
YFR029W	PTR3	92	35	38.0435	DAmP
YLR084C	RAX2	92	35	38.0435	deletion
YIL129C	TAO3	113	43	38.0531	DAmP
YML082W	YML082W	84	32	38.0952	deletion
YHR047C	AAP1	84	32	38.0952	deletion
YMR012W	CLU1	84	32	38.0952	deletion
YHR132C	ECM14	84	32	38.0952	deletion
YLR274W	MCM5	105	40	38.0952	DAmP
YPL169C	MEX67	84	32	38.0952	DAmP
YPL104W	MSD1	105	40	38.0952	deletion
YHR086W	NAM8	84	32	38.0952	deletion
YAR042W	SWH1	84	32	38.0952	deletion
YER113C	TMN3	126	48	38.0952	deletion
YDR238C	SEC26	97	37	38.1443	DAmP
YPL109C	YPL109C	76	29	38.1579	deletion
YDR478W	SNM1	76	29	38.1579	DAmP
YGL161C	YIP5	110	42	38.1818	deletion
YNL293W	MSB3	89	34	38.2022	deletion
YKL108W	SLD2	123	47	38.2114	DAmP
YBR181C	RPS6B	68	26	38.2353	deletion
YDR075W	PPH3	81	31	38.2716	deletion
YDR409W	SIZ1	81	31	38.2716	deletion
YGR074W	SMD1	81	31	38.2716	DAmP
YLL040C	VPS13	94	36	38.2979	deletion
YBL008W-A	YBL008W-A	107	41	38.3178	deletion
YOL038C-A	YOL038C-A	120	46	38.3333	deletion
YCL059C	KRR1	133	51	38.3459	DAmP
YDR219C	MFB1	73	28	38.3562	deletion
YGR114C	YGR114C	86	33	38.3721	DAmP
YPR160W	GPH1	86	33	38.3721	deletion
YLR259C	HSP60	86	33	38.3721	DAmP
YGR120C	COG2	99	38	38.3838	DAmP
YNL222W	SSU72	99	38	38.3838	DAmP
YCL021W-A	YCL021W-A	112	43	38.3929	deletion
YIL068C	SEC6	112	43	38.3929	DAmP
YPL216W	YPL216W	91	35	38.4615	deletion
YOR296W	YOR296W	78	30	38.4615	deletion
YEL029C	BUD16	117	45	38.4615	deletion
YHR104W	GRE3	91	35	38.4615	deletion
YBR227C	MCX1	78	30	38.4615	deletion
YDL105W	NSE4	117	45	38.4615	DAmP
YOL011W	PLB3	91	35	38.4615	deletion
YMR268C	PRP24	91	35	38.4615	DAmP
YDR136C	VPS61	65	25	38.4615	deletion
YOL097W-A	YOL097W-A	109	42	38.5321	deletion
YBR056W-A	YBR056W-A	109	42	38.5321	deletion
YAL025C	MAK16	205	79	38.5366	DAmP
YML086C	ALO1	96	37	38.5417	deletion
YGR127W	YGR127W	83	32	38.5542	deletion
YEL009C	GCN4	83	32	38.5542	deletion
YOL049W	GSH2	83	32	38.5542	deletion
YOL009C	MDM12	83	32	38.5542	deletion
YHR151C	MTC6	83	32	38.5542	deletion
YGR289C	MAL11	127	49	38.5827	deletion
YOL086W-A	MHF1	127	49	38.5827	deletion
YHR178W	STB5	101	39	38.6139	deletion
YOR024W	YOR024W	88	34	38.6364	deletion
YOR094W	ARF3	88	34	38.6364	deletion
YGR208W	SER2	88	34	38.6364	deletion
YNL097C-A	YNL097C-A	119	46	38.6555	deletion
YNL205C	YNL205C	75	29	38.6667	deletion
YNL058C	YNL058C	75	29	38.6667	deletion
YOL027C	MDM38	75	29	38.6667	deletion
YHR150W	PEX28	106	41	38.6792	deletion
YHR070W	TRM5	106	41	38.6792	DAmP
YLR111W	YLR111W	62	24	38.7097	deletion
YHR044C	DOG1	93	36	38.7097	deletion
YKL178C	STE3	93	36	38.7097	deletion
YMR255W	GFD1	111	43	38.7387	deletion
YJL109C	UTP10	111	43	38.7387	DAmP
YOR004W	UTP23	111	43	38.7387	DAmP
YPL271W	ATP15	80	31	38.75	deletion
YGR224W	AZR1	80	31	38.75	deletion
YCL016C	DCC1	80	31	38.75	deletion
YAL034C	FUN19	80	31	38.75	deletion
YHR086W-A	YHR086W-A	116	45	38.7931	deletion
YCL038C	ATG22	116	45	38.7931	deletion
YPR035W	GLN1	116	45	38.7931	DAmP
YCL026C-B	HBN1	116	45	38.7931	deletion
YPR033C	HTS1	116	45	38.7931	DAmP
YNL252C	MRPL17	134	52	38.806	deletion
YNL002C	RLP7	134	52	38.806	DAmP
YER035W	EDC2	85	33	38.8235	deletion
YOL065C	INP54	85	33	38.8235	deletion
YOR135C	IRC14	85	33	38.8235	deletion
YEL016C	NPP2	85	33	38.8235	deletion
YPL147W	PXA1	85	33	38.8235	deletion
YOL125W	TRM13	85	33	38.8235	deletion
YOR073W	SGO1	103	40	38.835	deletion
YKL106C-A	YKL106C-A	121	47	38.843	deletion
YKL018C-A	YKL018C-A	121	47	38.843	deletion
YGR164W	YGR164W	90	35	38.8889	deletion
YOR335C	ALA1	108	42	38.8889	DAmP
YLR215C	CDC123	126	49	38.8889	DAmP
YKL182W	FAS1	90	35	38.8889	DAmP
YBR215W	HPC2	72	28	38.8889	deletion
YHR181W	SVP26	90	35	38.8889	deletion
YJL187C	SWE1	72	28	38.8889	deletion
YPL122C	TFB2	108	42	38.8889	DAmP
YKR046C	PET10	95	37	38.9474	deletion
YNL203C	YNL203C	77	30	38.961	deletion
YGR205W	TDA10	77	30	38.961	deletion
YMR273C	ZDS1	77	30	38.961	deletion
YNL199C	GCR2	59	23	38.9831	deletion
YDR207C	UME6	59	23	38.9831	deletion
YKL164C	PIR1	100	39	39	deletion
YGR025W	YGR025W	82	32	39.0244	deletion
YMR275C	BUL1	82	32	39.0244	deletion
YMR278W	PRM15	82	32	39.0244	deletion
YDL043C	PRP11	105	41	39.0476	DAmP
YBR256C	RIB5	105	41	39.0476	DAmP
YKL032C	IXR1	64	25	39.0625	deletion
YAR043C	YAR043C	87	34	39.0805	deletion
YCR020C	PET18	87	34	39.0805	deletion
YNL162W	RPL42A	87	34	39.0805	deletion
YML052W	SUR7	87	34	39.0805	deletion
YPL180W	TCO89	87	34	39.0805	deletion
YBR223C	TDP1	87	34	39.0805	deletion
YBR235W	VHC1	87	34	39.0805	deletion
YGL068W	MNP1	110	43	39.0909	DAmP
YIL147C	SLN1	110	43	39.0909	DAmP
YDR131C	YDR131C	92	36	39.1304	deletion
YMR301C	ATM1	138	54	39.1304	DAmP
YLL062C	MHT1	92	36	39.1304	deletion
YER008C	SEC3	92	36	39.1304	DAmP
YLR066W	SPC3	115	45	39.1304	DAmP
YBR253W	SRB6	143	56	39.1608	DAmP
YGL196W	DSD1	97	38	39.1753	deletion
YGL007W	BRP1	74	29	39.1892	deletion
YMR013C	SEC59	102	40	39.2157	DAmP
YDR240C	SNU56	102	40	39.2157	DAmP
YER031C	YPT31	102	40	39.2157	deletion
YDL058W	USO1	130	51	39.2308	DAmP
YER068C-A	YER068C-A	79	31	39.2405	deletion
YAL037W	YAL037W	79	31	39.2405	deletion
YDL172C	YDL172C	79	31	39.2405	deletion
YLL019C	KNS1	79	31	39.2405	deletion
YOR350C	MNE1	79	31	39.2405	deletion
YGR014W	MSB2	79	31	39.2405	deletion
YOL102C	TPT1	79	31	39.2405	DAmP
YML048W-A	#N/A	79	31	39.2405	deletion
YNL124W	NAF1	107	42	39.2523	DAmP
YMR318C	ADH6	135	53	39.2593	deletion
YEL015W	EDC3	84	33	39.2857	deletion
YDR137W	RGP1	84	33	39.2857	deletion
YDR139C	RUB1	84	33	39.2857	deletion
YPL138C	SPP1	84	33	39.2857	deletion
YOR332W	VMA4	56	22	39.2857	deletion
YKL068W-A	YKL068W-A	117	46	39.3162	deletion
YAL059W	ECM1	117	46	39.3162	deletion
YJR013W	GPI14	117	46	39.3162	DAmP
YLL034C	RIX7	117	46	39.3162	DAmP
YJR072C	NPA3	89	35	39.3258	DAmP
YMR030W	RSF1	89	35	39.3258	deletion
YPL253C	VIK1	89	35	39.3258	deletion
YDL094C	YDL094C	94	37	39.3617	deletion
YMR010W	YMR010W	127	50	39.3701	deletion
YOL078W	AVO1	99	39	39.3939	DAmP
YDR150W	NUM1	66	26	39.3939	deletion
YPR183W	DPM1	104	41	39.4231	DAmP
YML033W	YML033W	71	28	39.4366	deletion
YLR131C	ACE2	109	43	39.4495	deletion
YLR102C	APC9	76	30	39.4737	deletion
YIL120W	QDR1	114	45	39.4737	deletion
YNL248C	RPA49	38	15	39.4737	deletion
YAL002W	VPS8	76	30	39.4737	deletion
YOL083W	ATG34	81	32	39.5062	deletion
YOL059W	GPD2	81	32	39.5062	deletion
YOR337W	TEA1	81	32	39.5062	deletion
YHR025W	THR1	81	32	39.5062	deletion
YNL267W	PIK1	124	49	39.5161	DAmP
YMR221C	YMR221C	86	34	39.5349	deletion
YOR034C-A	YOR034C-A	129	51	39.5349	deletion
YPR068C	HOS1	86	34	39.5349	deletion
YCR021C	HSP30	86	34	39.5349	deletion
YKR037C	SPC34	129	51	39.5349	DAmP
YNL204C	SPS18	86	34	39.5349	deletion
YHL020C	OPI1	134	53	39.5522	deletion
YGR232W	NAS6	91	36	39.5604	deletion
YDR400W	URH1	91	36	39.5604	deletion
YBR178W	YBR178W	96	38	39.5833	deletion
YOL086W-A	MHF1	106	42	39.6226	deletion
YBR055C	PRP6	106	42	39.6226	DAmP
YPL209C	IPL1	111	44	39.6396	DAmP
YAL061W	BDH2	116	46	39.6552	deletion
YJL077W-B	YJL077W-B	131	52	39.6947	deletion
YOR113W	AZF1	68	27	39.7059	deletion
YHR108W	GGA2	73	29	39.726	deletion
YGR174C	CBP4	78	31	39.7436	deletion
YDR399W	HPT1	78	31	39.7436	deletion
YCL024W	KCC4	78	31	39.7436	deletion
YKR056W	TRM2	78	31	39.7436	deletion
YDR119W	VBA4	78	31	39.7436	deletion
YOL075C	YOL075C	83	33	39.759	deletion
YOR300W	YOR300W	83	33	39.759	deletion
YML080W	DUS1	83	33	39.759	deletion
YHL046C	PAU13	83	33	39.759	deletion
YJL092W	SRS2	83	33	39.759	deletion
YPL214C	THI6	83	33	39.759	deletion
YHR204W	MNL1	88	35	39.7727	deletion
YLR125W	YLR125W	93	37	39.7849	deletion
YOR283W	YOR283W	93	37	39.7849	deletion
YHR113W	APE4	93	37	39.7849	deletion
YNL110C	NOP15	98	39	39.7959	DAmP
YML070W	DAK1	103	41	39.8058	deletion
YPR178W	PRP4	103	41	39.8058	DAmP
YNL268W	LYP1	108	43	39.8148	deletion
YPR042C	PUF2	108	43	39.8148	deletion
YLR428C	YLR428C	113	45	39.823	deletion
YOL038C-A	YOL038C-A	113	45	39.823	deletion
YDR187C	YDR187C	113	45	39.823	DAmP
YNL216W	RAP1	113	45	39.823	DAmP
YPR010C	RPA135	123	49	39.8374	DAmP
YGL145W	TIP20	128	51	39.8438	DAmP
YLR196W	PWP1	133	53	39.8496	DAmP
YLR072W	YLR072W	95	38	40	deletion
YOL029C	YOL029C	85	34	40	deletion
YMR141C	YMR141C	80	32	40	deletion
YOL035C	YOL035C	90	36	40	deletion
YLR012C	YLR012C	105	42	40	deletion
YMR122C	YMR122C	90	36	40	deletion
YER156C	YER156C	105	42	40	deletion
YOR020W-A	YOR020W-A	130	52	40	deletion
YOR058C	ASE1	85	34	40	deletion
YGR124W	ASN2	90	36	40	deletion
YLR348C	DIC1	85	34	40	deletion
YBR187W	GDT1	80	32	40	deletion
YBR004C	GPI18	100	40	40	DAmP
YMR204C	INP1	85	34	40	deletion
YOR123C	LEO1	70	28	40	deletion
YDR386W	MUS81	80	32	40	deletion
YMR026C	PEX12	85	34	40	deletion
YGL163C	RAD54	100	40	40	deletion
YMR258C	ROY1	105	42	40	deletion
YOR149C	SMP3	105	42	40	DAmP
YPL175W	SPT14	85	34	40	DAmP
YMR284W	YKU70	85	34	40	deletion
YLR277C	YSH1	105	42	40	DAmP
YDR353W	TRR1	132	53	40.1515	DAmP
YLR163C	MAS1	122	49	40.1639	DAmP
YHR007C-A	YHR007C-A	107	43	40.1869	deletion
YNL305C	BXI1	102	41	40.1961	deletion
YIL126W	STH1	92	37	40.2174	DAmP
YLL063C	AYT1	87	35	40.2299	deletion
YOL063C	CRT10	87	35	40.2299	deletion
YOL135C	MED7	87	35	40.2299	DAmP
YMR140W	SIP5	87	35	40.2299	deletion
YGR143W	SKN1	87	35	40.2299	deletion
YJL017W	YJL017W	82	33	40.2439	deletion
YKR035W-A	DID2	77	31	40.2597	deletion
YPL164C	MLH3	77	31	40.2597	deletion
YGL097W	SRM1	144	58	40.2778	DAmP
YNL238W	KEX2	62	25	40.3226	deletion
YML032C	RAD52	62	25	40.3226	deletion
YER087C-B	SBH1	119	48	40.3361	deletion
YNL097C-A	#N/A	114	46	40.3509	deletion
YAL037C-A	YAL037C-A	109	44	40.367	deletion
YBL105C	PKC1	104	42	40.3846	DAmP
YMR259C	TRM732	104	42	40.3846	deletion
YHR130C	YHR130C	99	40	40.404	deletion
YOR319W	HSH49	99	40	40.404	DAmP
YDR252W	BTT1	94	38	40.4255	deletion
YPR023C	EAF3	94	38	40.4255	deletion
YLR426W	TDA5	94	38	40.4255	deletion
YJR133W	XPT1	94	38	40.4255	deletion
YPL119C-A	YPL119C-A	178	72	40.4494	deletion
YHL019C	APM2	89	36	40.4494	deletion
YGR098C	ESP1	89	36	40.4494	DAmP
YCL056C	PEX34	89	36	40.4494	deletion
YLL041C	SDH2	89	36	40.4494	deletion
YOR052C	TMC1	89	36	40.4494	deletion
YOR034C-A	YOR034C-A	131	53	40.458	deletion
YAL044C	GCV3	84	34	40.4762	deletion
YER065C	ICL1	84	34	40.4762	deletion
YKR057W	RPS21A	84	34	40.4762	deletion
YLR070C	XYL2	84	34	40.4762	deletion
YCR022C	YCR022C	79	32	40.5063	deletion
YDL119C	YDL119C	79	32	40.5063	deletion
YIL079C	AIR1	79	32	40.5063	deletion
YJL172W	CPS1	79	32	40.5063	deletion
YER052C	HOM3	79	32	40.5063	deletion
YBL076C	ILS1	116	47	40.5172	DAmP
YPL151C	PRP46	116	47	40.5172	DAmP
YNR033W	ABZ1	111	45	40.5405	deletion
YGR142W	BTN2	74	30	40.5405	deletion
YIL027C	EMC5	74	30	40.5405	deletion
YDR439W	LRS4	74	30	40.5405	deletion
YIL115C	NUP159	74	30	40.5405	DAmP
YGL169W	SUA5	111	45	40.5405	DAmP
YDR460W	TFB3	111	45	40.5405	DAmP
YER033C	ZRG8	74	30	40.5405	deletion
YAL056W	GPB2	106	43	40.566	deletion
YDL111C	RRP42	106	43	40.566	DAmP
YML085C	TUB1	106	43	40.566	DAmP
YDR054C	CDC34	101	41	40.5941	DAmP
YPL043W	NOP4	101	41	40.5941	DAmP
YPL226W	NEW1	96	39	40.625	deletion
YGR183C	QCR9	96	39	40.625	deletion
YDL173W	PAR32	91	37	40.6593	deletion
YOR103C	OST2	118	48	40.678	DAmP
YDR515W	SLF1	118	48	40.678	deletion
YOR194C	TOA1	118	48	40.678	DAmP
YKL028W	TFA1	113	46	40.708	DAmP
YBR259W	YBR259W	81	33	40.7407	deletion
YFR020W	YFR020W	81	33	40.7407	deletion
YGR282C	BGL2	81	33	40.7407	deletion
YCL005W	LDB16	81	33	40.7407	deletion
YOL060C	MAM3	81	33	40.7407	deletion
YDR251W	PAM1	81	33	40.7407	deletion
YMR308C	PSE1	135	55	40.7407	DAmP
YLR061W	RPL22A	27	11	40.7407	deletion
YOR344C	TYE7	81	33	40.7407	deletion
YER142C	MAG1	103	42	40.7767	deletion
YLR298C	YHC1	103	42	40.7767	DAmP
YDR480W	DIG2	76	31	40.7895	deletion
YPL110C	GDE1	76	31	40.7895	deletion
YDR066C	RTR2	76	31	40.7895	deletion
YDR339C	FCF1	98	40	40.8163	DAmP
YDR458C	HEH2	147	60	40.8163	deletion
YBR043C	QDR3	98	40	40.8163	deletion
YDL221W	YDL221W	120	49	40.8333	DAmP
YJR100C	AIM25	120	49	40.8333	deletion
YGL148W	ARO2	93	38	40.8602	deletion
YJL167W	ERG20	93	38	40.8602	DAmP
YCR107W	AAD3	115	47	40.8696	deletion
YHL042W	YHL042W	88	36	40.9091	deletion
YGL061C	DUO1	88	36	40.9091	DAmP
YGL018C	JAC1	132	54	40.9091	DAmP
YDR200C	VPS64	66	27	40.9091	deletion
YLR116W	MSL5	105	43	40.9524	DAmP
YER056C	FCY2	83	34	40.9639	deletion
YOR071C	NRT1	83	34	40.9639	deletion
YIL117C	PRM5	83	34	40.9639	deletion
YNL334C	SNO2	83	34	40.9639	deletion
YGR236C	SPG1	83	34	40.9639	deletion
YGL214W	YGL214W	61	25	40.9836	deletion
YDL212W	SHR3	100	41	41	DAmP
YKL067W	YNK1	100	41	41	deletion
YPL108W	YPL108W	78	32	41.0256	deletion
YCL045C	EMC1	78	32	41.0256	deletion
YER002W	NOP16	78	32	41.0256	deletion
YHR001W-A	QCR10	78	32	41.0256	deletion
YBR246W	RRT2	78	32	41.0256	deletion
YGR184C	UBR1	78	32	41.0256	deletion
YDL126C	CDC48	134	55	41.0448	DAmP
YMR145C	NDE1	95	39	41.0526	deletion
YGR125W	YGR125W	112	46	41.0714	deletion
YGR175C	ERG1	112	46	41.0714	DAmP
YER087C-B	SBH1	112	46	41.0714	deletion
YOL015W	IRC10	73	30	41.0959	deletion
YHL033C	RPL8A	73	30	41.0959	deletion
YHR012W	VPS29	73	30	41.0959	deletion
YMR121C	RPL15B	90	37	41.1111	deletion
YOR046C	DBP5	124	51	41.129	DAmP
YOL144W	NOP8	124	51	41.129	DAmP
YOR050C	YOR050C	85	35	41.1765	deletion
YOR289W	YOR289W	85	35	41.1765	deletion
YIL067C	YIL067C	85	35	41.1765	deletion
YKL136W	YKL136W	85	35	41.1765	deletion
YKL049C	CSE4	102	42	41.1765	DAmP
YNL308C	KRI1	102	42	41.1765	DAmP
YGL201C	MCM6	119	49	41.1765	DAmP
YLR324W	PEX30	68	28	41.1765	deletion
YKL122C	SRP21	119	49	41.1765	DAmP
YOR086C	TCB1	85	35	41.1765	deletion
YKR042W	UTH1	85	35	41.1765	deletion
YLR272C	YCS4	114	47	41.2281	DAmP
YMR043W	MCM1	97	40	41.2371	DAmP
YMR166C	YMR166C	80	33	41.25	deletion
YHR039C	MSC7	80	33	41.25	deletion
YBR250W	SPO23	80	33	41.25	deletion
YLR130C	ZRT2	80	33	41.25	deletion
YMR167W	MLH1	63	26	41.2698	deletion
YOR020W-A	YOR020W-A	138	57	41.3043	deletion
YGR173W	RBG2	92	38	41.3043	deletion
YNL120C	YNL120C	75	31	41.3333	deletion
YDR373W	FRQ1	150	62	41.3333	DAmP
YLL005C	SPO75	133	55	41.3534	deletion
YBR174C	YBR174C	87	36	41.3793	deletion
YGR201C	YGR201C	116	48	41.3793	deletion
YLL003W	SFI1	145	60	41.3793	DAmP
YER041W	YEN1	87	36	41.3793	deletion
YBR162C	TOS1	99	41	41.4141	deletion
YHR129C	ARP1	70	29	41.4286	deletion
YLR390W-A	CCW14	70	29	41.4286	deletion
YBL007C	SLA1	70	29	41.4286	deletion
YHR196W	UTP9	70	29	41.4286	DAmP
YOR077W	RTS2	111	46	41.4414	DAmP
YOL014W	YOL014W	82	34	41.4634	deletion
YBR239C	ERT1	82	34	41.4634	deletion
YLR096W	KIN2	82	34	41.4634	deletion
YPR157W	TDA6	82	34	41.4634	deletion
YMR197C	VTI1	82	34	41.4634	DAmP
YHR022C	YHR022C	94	39	41.4894	deletion
YPR029C	APL4	94	39	41.4894	deletion
YDR070C	FMP16	94	39	41.4894	deletion
YPL103C	FMP30	94	39	41.4894	deletion
YOR329C	SCD5	94	39	41.4894	DAmP
YCL021W-A	YCL021W-A	106	44	41.5094	deletion
YOR260W	GCD1	118	49	41.5254	DAmP
YOL077W-A	ATP19	130	54	41.5385	deletion
YHR067W	HTD2	65	27	41.5385	deletion
YFL054C	YFL054C	77	32	41.5584	deletion
YDR111C	ALT2	77	32	41.5584	deletion
YMR225C	MRPL44	77	32	41.5584	deletion
YAR020C	PAU7	77	32	41.5584	deletion
YGR170W	PSD2	77	32	41.5584	deletion
YEL008W	YEL008W	89	37	41.573	deletion
YDR250C	YDR250C	89	37	41.573	deletion
YDR430C	CYM1	89	37	41.573	deletion
YNR038W	DBP6	89	37	41.573	DAmP
YMR189W	GCV2	89	37	41.573	deletion
YER062C	GPP2	89	37	41.573	deletion
YOR298W	MUM3	89	37	41.573	deletion
YGR147C	NAT2	101	42	41.5842	DAmP
YOR098C	NUP1	101	42	41.5842	DAmP
YGR245C	SDA1	101	42	41.5842	DAmP
YLR126C	YLR126C	84	35	41.6667	deletion
YMR044W	IOC4	84	35	41.6667	deletion
YGR244C	LSC2	84	35	41.6667	deletion
YDL160C-A	MHF2	108	45	41.6667	deletion
YDR383C	NKP1	84	35	41.6667	deletion
YLR305C	STT4	84	35	41.6667	DAmP
YHR106W	TRR2	72	30	41.6667	deletion
YFL009W	CDC4	127	53	41.7323	DAmP
YAL044W-A	YAL044W-A	115	48	41.7391	deletion
YGR092W	DBF2	115	48	41.7391	deletion
YER180C	ISC10	115	48	41.7391	deletion
YOR158W	PET123	115	48	41.7391	deletion
YOR293W	RPS10A	115	48	41.7391	deletion
YDR326C	YSP2	115	48	41.7391	deletion
YLL050C	COF1	103	43	41.7476	DAmP
YLR085C	ARP6	91	38	41.7582	deletion
YGL197W	MDS3	91	38	41.7582	deletion
YOR285W	RDL1	91	38	41.7582	deletion
YMR173W-A	YMR173W-A	79	33	41.7722	deletion
YOR097C	YOR097C	79	33	41.7722	deletion
YMR025W	CSI1	79	33	41.7722	deletion
YMR176W	ECM5	79	33	41.7722	deletion
YDR309C	GIC2	79	33	41.7722	deletion
YBR185C	MBA1	79	33	41.7722	deletion
YHR160C	PEX18	79	33	41.7722	deletion
YLL024C	SSA2	79	33	41.7722	deletion
YFR010W	UBP6	79	33	41.7722	deletion
YPR025C	CCL1	110	46	41.8182	DAmP
YMR257C	PET111	110	46	41.8182	deletion
YBR014C	GRX7	98	41	41.8367	deletion
YGL091C	NBP35	98	41	41.8367	DAmP
YHL021C	AIM17	86	36	41.8605	deletion
YPL227C	ALG5	86	36	41.8605	deletion
YOR005C	DNL4	86	36	41.8605	deletion
YOR047C	STD1	86	36	41.8605	deletion
YDR032C	PST2	105	44	41.9048	deletion
YIL043C	CBR1	93	39	41.9355	deletion
YBR183W	YPC1	93	39	41.9355	deletion
YGR113W	DAM1	112	47	41.9643	DAmP
YEL020C	YEL020C	81	34	41.9753	deletion
YLR123C	YLR123C	81	34	41.9753	deletion
YGR226C	YGR226C	81	34	41.9753	deletion
YBR194W	AIM4	81	34	41.9753	deletion
YMR113W	FOL3	81	34	41.9753	DAmP
YOR021C	SFM1	81	34	41.9753	deletion
YBR175W	SWD3	81	34	41.9753	deletion
YNL206C	RTT106	100	42	42	deletion
YGL177W	YGL177W	119	50	42.0168	deletion
YJL087C	TRL1	119	50	42.0168	DAmP
YEL036C	ANP1	88	37	42.0455	deletion
YPL189W	GUP2	88	37	42.0455	deletion
YOR076C	SKI7	88	37	42.0455	deletion
YIL085C	KTR7	107	45	42.0561	deletion
YOR133W	EFT1	95	40	42.1053	deletion
YLR083C	EMP70	76	32	42.1053	deletion
YMR247C	RKR1	76	32	42.1053	deletion
YOR315W	SFG1	76	32	42.1053	deletion
YOR124C	UBP2	76	32	42.1053	deletion
YNL067W-B	YNL067W-B	121	51	42.1488	deletion
YCL026C-B	HBN1	121	51	42.1488	deletion
YBR121C	GRS1	102	43	42.1569	DAmP
YHR158C	KEL1	102	43	42.1569	deletion
YHL003C	LAG1	102	43	42.1569	deletion
YGL055W	OLE1	102	43	42.1569	DAmP
YCR030C	SYP1	102	43	42.1569	deletion
YBR197C	YBR197C	83	35	42.1687	deletion
YOR292C	YOR292C	83	35	42.1687	deletion
YMR244W	YMR244W	83	35	42.1687	deletion
YHR202W	YHR202W	83	35	42.1687	deletion
YML087C	AIM33	83	35	42.1687	deletion
YGR249W	MGA1	83	35	42.1687	deletion
YML063W	RPS1B	83	35	42.1687	deletion
YDR107C	TMN2	83	35	42.1687	deletion
YHR105W	YPT35	83	35	42.1687	deletion
YGR146C-A	YGR146C-A	128	54	42.1875	deletion
YIL022W	TIM44	109	46	42.2018	DAmP
YDL131W	LYS21	90	38	42.2222	deletion
YML077W	BET5	116	49	42.2414	DAmP
YPL161C	BEM4	71	30	42.2535	deletion
YMR299C	DYN3	71	30	42.2535	deletion
YNL188W	KAR1	97	41	42.268	DAmP
YLR078C	BOS1	104	44	42.3077	DAmP
YDR168W	CDC37	104	44	42.3077	DAmP
YNL323W	LEM3	78	33	42.3077	deletion
YDL104C	QRI7	52	22	42.3077	deletion
YPL133C	RDS2	78	33	42.3077	deletion
YLR059C	REX2	78	33	42.3077	deletion
YKL051W	SFK1	78	33	42.3077	deletion
YIL046W-A	YIL046W-A	137	58	42.3358	deletion
YAL037C-A	YAL037C-A	111	47	42.3423	deletion
YOL050C	YOL050C	85	36	42.3529	deletion
YER010C	YER010C	85	36	42.3529	deletion
YDR387C	YDR387C	85	36	42.3529	deletion
YPL197C	YPL197C	85	36	42.3529	deletion
YHR203C	RPS4B	85	36	42.3529	deletion
YLR025W	SNF7	85	36	42.3529	deletion
YHR014W	SPO13	85	36	42.3529	deletion
YJL056C	ZAP1	85	36	42.3529	deletion
YCL027W	FUS1	92	39	42.3913	deletion
YCR019W	MAK32	92	39	42.3913	deletion
YJL203W	PRP21	92	39	42.3913	DAmP
YBR214W	SDS24	92	39	42.3913	deletion
YLL051C	FRE6	99	42	42.4242	deletion
YNL132W	KRE33	99	42	42.4242	DAmP
YML065W	ORC1	99	42	42.4242	DAmP
YGR058W	PEF1	66	28	42.4242	deletion
YOR159C	SME1	106	45	42.4528	DAmP
YGR090W	UTP22	106	45	42.4528	DAmP
YER057C	HMF1	73	31	42.4658	deletion
YIR033W	MGA2	73	31	42.4658	deletion
YLR265C	NEJ1	73	31	42.4658	deletion
YOR259C	RPT4	113	48	42.4779	DAmP
YLR086W	SMC4	113	48	42.4779	DAmP
YGR126W	YGR126W	80	34	42.5	deletion
YLR127C	APC2	120	51	42.5	DAmP
YHR209W	CRG1	80	34	42.5	deletion
YDR420W	HKR1	80	34	42.5	deletion
YPL208W	RKM1	80	34	42.5	deletion
YCL063W	VAC17	80	34	42.5	deletion
YGR258C	RAD2	127	54	42.5197	deletion
YLR149C	YLR149C	174	74	42.5287	deletion
YKL187C	FAT3	87	37	42.5287	deletion
YDR258C	HSP78	87	37	42.5287	deletion
YLR104W	LCL2	87	37	42.5287	deletion
YKL012W	PRP40	87	37	42.5287	DAmP
YNR016C	ACC1	94	40	42.5532	DAmP
YBR102C	EXO84	94	40	42.5532	DAmP
YEL032W	MCM3	141	60	42.5532	DAmP
YER075C	PTP3	94	40	42.5532	deletion
YHR050W	SMF2	94	40	42.5532	deletion
YPL077C	YPL077C	101	43	42.5743	deletion
YCL057C-A	MIC10	101	43	42.5743	deletion
YPR108W	RPN7	101	43	42.5743	DAmP
YBRF182C-A	#N/A	101	43	42.5743	deletion
YKR008W	RSC4	155	66	42.5806	DAmP
YGL065C	ALG2	108	46	42.5926	DAmP
YDR050C	TPI1	108	46	42.5926	DAmP
YIL008W	URM1	54	23	42.5926	deletion
YGR171C	MSM1	61	26	42.623	deletion
YGL140C	YGL140C	136	58	42.6471	deletion
YMR294W	JNM1	68	29	42.6471	deletion
YOL076W	MDM20	68	29	42.6471	deletion
YCL046W	YCL046W	75	32	42.6667	deletion
YLR282C	YLR282C	75	32	42.6667	deletion
YNL291C	MID1	75	32	42.6667	deletion
YGR161C	RTS3	75	32	42.6667	deletion
YKL126W	YPK1	75	32	42.6667	deletion
YFL024C	EPL1	82	35	42.6829	DAmP
YGR138C	TPO2	82	35	42.6829	deletion
YIL064W	EFM4	89	38	42.6966	deletion
YPL242C	IQG1	89	38	42.6966	DAmP
YMR086W	SEG1	89	38	42.6966	deletion
YDR104C	SPO71	89	38	42.6966	deletion
YNL088W	TOP2	110	47	42.7273	DAmP
YNL067W-B	YNL067W-B	117	50	42.735	deletion
YOR060C	SLD7	117	50	42.735	DAmP
YJR117W	STE24	173	74	42.7746	deletion
YEL045C	YEL045C	77	33	42.8571	deletion
YMR087W	YMR087W	77	33	42.8571	deletion
YGR237C	YGR237C	84	36	42.8571	deletion
YOR316C-A	YOR316C-A	175	75	42.8571	deletion
YGR097W	ASK10	70	30	42.8571	deletion
YNR057C	BIO4	105	45	42.8571	deletion
YEL061C	CIN8	98	42	42.8571	deletion
YMR276W	DSK2	77	33	42.8571	deletion
YMR020W	FMS1	84	36	42.8571	deletion
YNL318C	HXT14	91	39	42.8571	deletion
YNL215W	IES2	63	27	42.8571	deletion
YDR148C	KGD2	105	45	42.8571	deletion
YCL034W	LSB5	70	30	42.8571	deletion
YMR021C	MAC1	77	33	42.8571	deletion
YOR351C	MEK1	77	33	42.8571	deletion
YCL044C	MGR1	70	30	42.8571	deletion
YEL007W	MIT1	91	39	42.8571	deletion
YIL045W	PIG2	84	36	42.8571	deletion
YDL102W	POL3	119	51	42.8571	DAmP
YKL045W	PRI2	112	48	42.8571	DAmP
YKL042W	SPC42	98	42	42.8571	DAmP
YER115C	SPR6	126	54	42.8571	deletion
YNL025C	SSN8	77	33	42.8571	deletion
YJL054W	TIM54	105	45	42.8571	DAmP
YBR216C	YBP1	70	30	42.8571	deletion
YOR087W	YVC1	105	45	42.8571	deletion
YMR213W	CEF1	114	49	42.9825	DAmP
YMR240C	CUS1	114	49	42.9825	DAmP
YJL103C	GSM1	114	49	42.9825	deletion
YJR005C-A	LSO1	114	49	42.9825	deletion
YDR379C-A	SDH6	114	49	42.9825	deletion
YOR206W	NOC2	100	43	43	DAmP
YOR264W	DSE3	93	40	43.0108	deletion
YIL074C	SER33	86	37	43.0233	deletion
YHR207C	SET5	86	37	43.0233	deletion
YLR043C	TRX1	86	37	43.0233	deletion
YGR011W	YGR011W	79	34	43.038	deletion
YIL028W	YIL028W	79	34	43.038	deletion
YOR330C	MIP1	79	34	43.038	deletion
YOR290C	SNF2	79	34	43.038	deletion
YPR148C	YPR148C	72	31	43.0556	deletion
YMR157C	AIM36	72	31	43.0556	deletion
YPR164W	MMS1	72	31	43.0556	deletion
YJL136W-A	YJL136W-A	123	53	43.0894	deletion
YBR056W-A	YBR056W-A	109	47	43.1193	deletion
YER006W	NUG1	109	47	43.1193	DAmP
YPR105C	COG4	102	44	43.1373	DAmP
YCL026C-A	FRM2	102	44	43.1373	deletion
YOR358W	HAP5	88	38	43.1818	deletion
YNL231C	PDR16	88	38	43.1818	deletion
YBL014C	RRN6	88	38	43.1818	DAmP
YJL047C	RTT101	88	38	43.1818	deletion
YHR095W	YHR095W	81	35	43.2099	deletion
YOR072W	YOR072W	81	35	43.2099	deletion
YNR071C	YNR071C	81	35	43.2099	deletion
YPL259C	APM1	81	35	43.2099	deletion
YLR098C	CHA4	81	35	43.2099	deletion
YPL170W	DAP1	81	35	43.2099	deletion
YNL281W	HCH1	81	35	43.2099	deletion
YLR004C	THI73	81	35	43.2099	deletion
YOR297C	TIM18	81	35	43.2099	deletion
YLR262C	YPT6	81	35	43.2099	deletion
YEL001C	IRC22	74	32	43.2432	deletion
YOR226C	ISU2	74	32	43.2432	deletion
YER022W	SRB4	111	48	43.2432	DAmP
YCL037C	SRO9	74	32	43.2432	deletion
YMR243C	ZRC1	74	32	43.2432	deletion
YAL044W-A	YAL044W-A	104	45	43.2692	deletion
YBR281C	DUG2	104	45	43.2692	deletion
YOR116C	RPO31	104	45	43.2692	DAmP
YLR167W	RPS31	104	45	43.2692	DAmP
YPL063W	TIM50	104	45	43.2692	DAmP
YJL048C	UBX6	104	45	43.2692	deletion
YMR194C-B	CMC4	134	58	43.2836	deletion
YMR260C	TIF11	67	29	43.2836	DAmP
YKL215C	OXP1	97	42	43.299	deletion
YPR169W	JIP5	127	55	43.3071	DAmP
YDR346C	SVF1	90	39	43.3333	deletion
YOR376W	YOR376W	83	36	43.3735	deletion
YDL239C	ADY3	83	36	43.3735	deletion
YLR003C	CMS1	83	36	43.3735	deletion
YPL194W	DDC1	83	36	43.3735	deletion
YLR013W	GAT3	83	36	43.3735	deletion
YCL004W	PGS1	129	56	43.4109	DAmP
YDR079C-A	TFB5	129	56	43.4109	deletion
YJR087W	YJR087W	76	33	43.4211	deletion
YER069W	ARG5,6	76	33	43.4211	deletion
YER032W	FIR1	76	33	43.4211	deletion
YDR140W	MTQ2	76	33	43.4211	deletion
YBR233W	PBP2	76	33	43.4211	deletion
YER007C-A	TMA20	76	33	43.4211	deletion
YOR379C	YOR379C	99	43	43.4343	deletion
YPL117C	IDI1	99	43	43.4343	DAmP
YGL233W	SEC15	99	43	43.4343	DAmP
YNL287W	SEC21	99	43	43.4343	DAmP
YDR037W	KRS1	46	20	43.4783	DAmP
YAL034W-A	MTW1	115	50	43.4783	DAmP
YGL062W	PYC1	92	40	43.4783	deletion
YPL220W	RPL1A	92	40	43.4783	deletion
YDL140C	RPO21	161	70	43.4783	DAmP
YKL035W	UGP1	115	50	43.4783	DAmP
YHR022C-A	YHR022C-A	108	47	43.5185	deletion
YCL057C-A	MIC10	108	47	43.5185	deletion
YIL072W	HOP1	85	37	43.5294	deletion
YJR099W	YUH1	85	37	43.5294	deletion
YNL141W	AAH1	101	44	43.5644	deletion
YBR226C	YBR226C	78	34	43.5897	deletion
YJL062W-A	COA3	117	51	43.5897	deletion
YKL179C	COY1	78	34	43.5897	deletion
YER166W	DNF1	117	51	43.5897	deletion
YOR382W	FIT2	78	34	43.5897	deletion
YBR207W	FTH1	78	34	43.5897	deletion
YGL216W	KIP3	78	34	43.5897	deletion
YNL306W	MRPS18	117	51	43.5897	DAmP
YHR120W	MSH1	39	17	43.5897	deletion
YML024W	RPS17A	39	17	43.5897	deletion
YPR016C	TIF6	94	41	43.617	DAmP
YMR309C	NIP1	110	48	43.6364	DAmP
YLL002W	RTT109	55	24	43.6364	deletion
YDR322C-A	TIM11	110	48	43.6364	deletion
YDR246W	TRS23	126	55	43.6508	DAmP
YLR341W	SPO77	71	31	43.662	deletion
YBR184W	YBR184W	87	38	43.6782	deletion
YBR188C	NTC20	87	38	43.6782	deletion
YER124C	DSE1	103	45	43.6893	deletion
YOR176W	HEM15	103	45	43.6893	DAmP
YMR253C	YMR253C	119	52	43.6975	deletion
YDL085C-A	YDL085C-A	151	66	43.7086	deletion
YER067C-A	YER067C-A	80	35	43.75	deletion
YPL247C	YPL247C	80	35	43.75	deletion
YOR311C	DGK1	80	35	43.75	deletion
YNL130C-A	DGR1	112	49	43.75	deletion
YPL091W	GLR1	64	28	43.75	deletion
YFR022W	ROG3	80	35	43.75	deletion
YKL056C	TMA19	64	28	43.75	deletion
YDR407C	TRS120	112	49	43.75	DAmP
YPL234C	VMA11	80	35	43.75	deletion
YDL120W	YFH1	96	42	43.75	DAmP
YOR064C	YNG1	80	35	43.75	deletion
YIR044C	#N/A	80	35	43.75	deletion
YOR272W	YTM1	105	46	43.8095	DAmP
YER085C	YER085C	89	39	43.8202	deletion
YGR157W	CHO2	89	39	43.8202	deletion
YML126C	ERG13	89	39	43.8202	DAmP
YOL002C	IZH2	89	39	43.8202	deletion
YKL171W	NNK1	89	39	43.8202	deletion
YGR046W	TAM41	89	39	43.8202	DAmP
YMR310C	YMR310C	73	32	43.8356	deletion
YBR220C	YBR220C	73	32	43.8356	deletion
YDR096W	GIS1	73	32	43.8356	deletion
YJL011C	RPC17	73	32	43.8356	DAmP
YGL152C	YGL152C	114	50	43.8596	deletion
YOR257W	CDC31	114	50	43.8596	DAmP
YGL003C	CDH1	57	25	43.8596	deletion
YPR104C	FHL1	114	50	43.8596	DAmP
YPR159C-A	YPR159C-A	212	93	43.8679	deletion
YKR090W	PXL1	98	43	43.8776	deletion
YMR027W	YMR027W	82	36	43.9024	deletion
YER140W	EMP65	123	54	43.9024	deletion
YHR049W	FSH1	82	36	43.9024	deletion
YER027C	GAL83	82	36	43.9024	deletion
YDL010W	GRX6	82	36	43.9024	deletion
YNL030W	HHF2	82	36	43.9024	deletion
YCL047C	POF1	82	36	43.9024	deletion
YDR376W	ARH1	107	47	43.9252	DAmP
YFR026C	ULI1	66	29	43.9394	deletion
YOR280C	FSH3	91	40	43.956	deletion
YNL339C	YRF1-6	91	40	43.956	deletion
YCR075W-A	YCR075W-A	116	51	43.9655	deletion
YKL021C	MAK11	116	51	43.9655	DAmP
YPL195W	APL5	75	33	44	deletion
YCL029C	BIK1	75	33	44	deletion
YNL265C	IST1	100	44	44	deletion
YDR289C	RTT103	75	33	44	deletion
YGR197C	SNG1	75	33	44	deletion
YDR084C	TVP23	100	44	44	deletion
YIL031W	ULP2	75	33	44	DAmP
YDL077C	VAM6	100	44	44	deletion
YHL035C	VMR1	75	33	44	deletion
YMR252C	YMR252C	109	48	44.0367	deletion
YBR016W	YBR016W	109	48	44.0367	deletion
YLR141W	RRN5	109	48	44.0367	DAmP
YGR146C	ECL1	84	37	44.0476	deletion
YDL100C	GET3	84	37	44.0476	deletion
YOR001W	RRP6	84	37	44.0476	deletion
YJL141C	YAK1	84	37	44.0476	deletion
YPL038W-A	YPL038W-A	177	78	44.0678	deletion
YER186W-A	YER186W-A	118	52	44.0678	deletion
YDR077W	SED1	93	41	44.086	deletion
YMR193C-A	YMR193C-A	68	30	44.1176	deletion
YHR049C-A	YHR049C-A	102	45	44.1176	deletion
YNL200C	YNL200C	68	30	44.1176	deletion
YGL238W	CSE1	102	45	44.1176	DAmP
YMR239C	RNT1	68	30	44.1176	DAmP
YIL075C	RPN2	102	45	44.1176	DAmP
YOR007C	SGT2	102	45	44.1176	deletion
YDR356W	SPC110	102	45	44.1176	DAmP
YDR492W	IZH1	111	49	44.1441	deletion
YPL010W	RET3	111	49	44.1441	DAmP
YLR354C	TAL1	111	49	44.1441	deletion
YLR089C	ALT1	77	34	44.1558	deletion
YOR227W	HER1	77	34	44.1558	deletion
YHR094C	HXT1	77	34	44.1558	deletion
YAR002W	NUP60	77	34	44.1558	deletion
YGR141W	VPS62	77	34	44.1558	deletion
YMR057C	YMR057C	120	53	44.1667	deletion
YLR223C	IFH1	86	38	44.186	DAmP
YPL273W	SAM4	86	38	44.186	deletion
YGR110W	CLD1	95	42	44.2105	deletion
YHL015W	RPS20	95	42	44.2105	DAmP
YLR458W	YLR458W	104	46	44.2308	DAmP
YBR019C	GAL10	104	46	44.2308	deletion
YNL004W	HRB1	104	46	44.2308	deletion
YDL007W	RPT2	104	46	44.2308	DAmP
YPR056W	TFB4	104	46	44.2308	DAmP
YOL099C	YOL099C	113	50	44.2478	deletion
YNL247W	YNL247W	113	50	44.2478	DAmP
YML043C	RRN11	113	50	44.2478	DAmP
YJR067C	YAE1	122	54	44.2623	DAmP
YOL082W	ATG19	70	31	44.2857	deletion
YLR390W	ECM19	70	31	44.2857	deletion
YBR142W	MAK5	140	62	44.2857	DAmP
YKL206C	ADD66	79	35	44.3038	deletion
YHR126C	ANS1	79	35	44.3038	deletion
YLR023C	IZH3	79	35	44.3038	deletion
YML060W	OGG1	79	35	44.3038	deletion
YMR156C	TPP1	79	35	44.3038	deletion
YBR028C	YPK3	79	35	44.3038	deletion
YOL153C	#N/A	79	35	44.3038	deletion
YNR058W	BIO3	88	39	44.3182	deletion
YIL019W	FAF1	88	39	44.3182	DAmP
YBR034C	HMT1	88	39	44.3182	deletion
YOL123W	HRP1	88	39	44.3182	DAmP
YPR024W	YME1	88	39	44.3182	deletion
YNL103W	MET4	97	43	44.3299	DAmP
YAL055W	PEX22	106	47	44.3396	deletion
YBL039W-A	#N/A	106	47	44.3396	deletion
YKL200C	YKL200C	115	51	44.3478	deletion
YKL047W	ANR2	142	63	44.3662	deletion
YOR256C	TRE2	142	63	44.3662	DAmP
YDR132C	YDR132C	72	32	44.4444	deletion
YNL320W	YNL320W	81	36	44.4444	deletion
YKL106C-A	YKL106C-A	117	52	44.4444	deletion
YPL069C	BTS1	99	44	44.4444	deletion
YLR175W	CBF5	117	52	44.4444	DAmP
YMR311C	GLC8	81	36	44.4444	deletion
YGR032W	GSC2	63	28	44.4444	deletion
YOR360C	PDE2	81	36	44.4444	deletion
YMR143W	RPS16A	54	24	44.4444	deletion
YHR021C	RPS27B	117	52	44.4444	deletion
YBR171W	SEC66	81	36	44.4444	deletion
YHL006C	SHU1	81	36	44.4444	deletion
YOL052C	SPE2	90	40	44.4444	deletion
YDR319C	YFT2	72	32	44.4444	deletion
YBL039W-A	#N/A	108	48	44.4444	deletion
YOL105C	WSC3	182	81	44.5055	deletion
YER182W	FMP10	128	57	44.5312	deletion
YJR061W	YJR061W	119	53	44.5378	deletion
YER119C	AVT6	110	49	44.5455	deletion
YBR109C	CMD1	101	45	44.5545	DAmP
YOR168W	GLN4	101	45	44.5545	DAmP
YPL223C	GRE1	101	45	44.5545	deletion
YGR222W	PET54	101	45	44.5545	deletion
YDR030C	RAD28	101	45	44.5545	deletion
YLL053C	YLL053C	92	41	44.5652	deletion
YPL078C	ATP4	92	41	44.5652	deletion
YHR057C	CPR2	92	41	44.5652	deletion
YMR049C	ERB1	92	41	44.5652	DAmP
YOR338W	YOR338W	83	37	44.5783	deletion
YEL052W	AFG1	83	37	44.5783	deletion
YMR237W	BCH1	83	37	44.5783	deletion
YMR246W	FAA4	83	37	44.5783	deletion
YBR244W	GPX2	83	37	44.5783	deletion
YFR025C	HIS2	83	37	44.5783	deletion
YGR136W	LSB1	83	37	44.5783	deletion
YDR419W	RAD30	83	37	44.5783	deletion
YKL050C	YKL050C	74	33	44.5946	deletion
YKL077W	YKL077W	74	33	44.5946	deletion
YGR042W	YGR042W	74	33	44.5946	deletion
YMR180C	CTL1	74	33	44.5946	deletion
YGR187C	HGH1	74	33	44.5946	deletion
YOR025W	HST3	74	33	44.5946	deletion
YIR017C	MET28	74	33	44.5946	deletion
YBR186W	PCH2	74	33	44.5946	deletion
YNL332W	THI12	74	33	44.5946	deletion
YBR058C	UBP14	74	33	44.5946	deletion
YBL097W	BRN1	139	62	44.6043	DAmP
YDR379C-A	SDH6	121	54	44.6281	deletion
YLR342W-A	YLR342W-A	112	50	44.6429	deletion
YER013W	PRP22	56	25	44.6429	DAmP
YMR144W	YMR144W	103	46	44.6602	deletion
YJR049C	UTR1	103	46	44.6602	deletion
YBR072C-A	YBR072C-A	141	63	44.6809	deletion
YBR106W	PHO88	47	21	44.6809	deletion
YDR034W-B	YDR034W-B	132	59	44.697	deletion
YDR133C	YDR133C	85	38	44.7059	deletion
YPR039W	YPR039W	85	38	44.7059	deletion
YLR211C	ATG38	85	38	44.7059	deletion
YPR171W	BSP1	85	38	44.7059	deletion
YOR383C	FIT3	85	38	44.7059	deletion
YHR096C	HXT5	85	38	44.7059	deletion
YMR193W	MRPL24	85	38	44.7059	deletion
YJR033C	RAV1	85	38	44.7059	deletion
YNL294C	RIM21	85	38	44.7059	deletion
YOR312C	RPL20B	85	38	44.7059	deletion
YOR305W	RRG7	85	38	44.7059	deletion
YNL257C	SIP3	85	38	44.7059	deletion
YPL201C	YIG1	85	38	44.7059	deletion
YDL150W	RPC53	123	55	44.7154	DAmP
YFL040W	YFL040W	76	34	44.7368	deletion
YDL129W	YDL129W	114	51	44.7368	deletion
YOR356W	CIR2	76	34	44.7368	deletion
YDL226C	GCS1	76	34	44.7368	deletion
YLR097C	HRT3	76	34	44.7368	deletion
YML062C	MFT1	76	34	44.7368	deletion
YMR118C	SHH3	76	34	44.7368	deletion
YNR015W	SMM1	76	34	44.7368	deletion
YOR247W	SRL1	76	34	44.7368	deletion
YOR179C	SYC1	76	34	44.7368	deletion
YHR159W	TDA11	76	34	44.7368	deletion
YMR277W	FCP1	105	47	44.7619	DAmP
YER109C	FLO8	105	47	44.7619	deletion
YDR417C	YDR417C	134	60	44.7761	deletion
YGR265W	YGR265W	134	60	44.7761	DAmP
YGL132W	YGL132W	116	52	44.8276	deletion
YIL102C	YIL102C	116	52	44.8276	deletion
YMR056C	AAC1	116	52	44.8276	deletion
YGL195W	GCN1	87	39	44.8276	deletion
YDR506C	GMC1	116	52	44.8276	deletion
YNL249C	MPA43	87	39	44.8276	deletion
YOR334W	MRS2	58	26	44.8276	deletion
YDL122W	UBP1	87	39	44.8276	deletion
YBR238C	YBR238C	78	35	44.8718	deletion
YOR240W	YOR240W	78	35	44.8718	deletion
YCR005C	CIT2	78	35	44.8718	deletion
YOR042W	CUE5	78	35	44.8718	deletion
YIR031C	DAL7	78	35	44.8718	deletion
YNL327W	EGT2	78	35	44.8718	deletion
YPL254W	HFI1	78	35	44.8718	deletion
YDR097C	MSH6	78	35	44.8718	deletion
YDR406W	PDR15	78	35	44.8718	deletion
YGL006W	PMC1	78	35	44.8718	deletion
YBR228W	SLX1	78	35	44.8718	deletion
YLR010C	TEN1	78	35	44.8718	DAmP
YGR181W	TIM13	78	35	44.8718	deletion
YEL004W	YEA4	78	35	44.8718	deletion
YKL175W	ZRT3	78	35	44.8718	deletion
YCR090C	YCR090C	98	44	44.898	deletion
YDR537C	YDR537C	98	44	44.898	deletion
YJL125C	GCD14	98	44	44.898	DAmP
YOL008W	COQ10	69	31	44.9275	deletion
YGL050W	TYW3	69	31	44.9275	deletion
YBR209W	YBR209W	89	40	44.9438	deletion
YPL245W	YPL245W	89	40	44.9438	deletion
YOR258W	HNT3	89	40	44.9438	deletion
YLR107W	REX3	89	40	44.9438	deletion
YMR104C	YPK2	89	40	44.9438	deletion
YFL052W	YFL052W	100	45	45	deletion
YBL095W	YBL095W	80	36	45	deletion
YDR121W	DPB4	80	36	45	deletion
YCR034W	ELO2	100	45	45	deletion
YLR342W	FKS1	80	36	45	deletion
YFR002W	NIC96	100	45	45	DAmP
YDR170C	SEC7	100	45	45	DAmP
YPL016W	SWI1	120	54	45	DAmP
YLL008W	DRS1	131	59	45.0382	DAmP
YOR302W	YOR302W	111	50	45.045	deletion
YGR030C	POP6	91	41	45.0549	DAmP
YPR152C	URN1	91	41	45.0549	deletion
YER048C	CAJ1	71	32	45.0704	deletion
YOLO57W	#N/A	71	32	45.0704	deletion
YHR007C-A	YHR007C-A	102	46	45.098	deletion
YMR023C	MSS1	133	60	45.1128	deletion
YCL042W	YCL042W	82	37	45.122	deletion
YOR302W	YOR302W	82	37	45.122	deletion
YLR285W	NNT1	82	37	45.122	deletion
YKL055C	OAR1	82	37	45.122	deletion
YGR178C	PBP1	82	37	45.122	deletion
YJR007W	SUI2	82	37	45.122	DAmP
YOR003W	YSP3	82	37	45.122	deletion
YKL063C	YKL063C	113	51	45.1327	deletion
YOL077W-A	ATP19	113	51	45.1327	deletion
YNL191W	DUG3	124	56	45.1613	deletion
YEL053C	MAK10	93	42	45.1613	deletion
YJL062W-A	COA3	104	47	45.1923	deletion
YMR181C	YMR181C	73	33	45.2055	deletion
YLR063W	BMT6	73	33	45.2055	deletion
YOR078W	BUD21	73	33	45.2055	deletion
YDL174C	DLD1	73	33	45.2055	deletion
YLR284C	ECI1	73	33	45.2055	deletion
YLR077W	FMP25	73	33	45.2055	deletion
YDR315C	IPK1	73	33	45.2055	deletion
YKL205W	LOS1	73	33	45.2055	deletion
YOR081C	TGL5	73	33	45.2055	deletion
YEL067C	YEL067C	84	38	45.2381	deletion
YCR016W	YCR016W	84	38	45.2381	deletion
YLR287C	YLR287C	84	38	45.2381	deletion
YMR303C	ADH2	84	38	45.2381	deletion
YBR245C	ISW1	84	38	45.2381	deletion
YAL015C	NTG1	84	38	45.2381	deletion
YOL043C	NTG2	84	38	45.2381	deletion
YLR008C	PAM18	126	57	45.2381	DAmP
YOR145C	PNO1	84	38	45.2381	DAmP
YEL024W	RIP1	84	38	45.2381	deletion
YMR272C	SCS7	84	38	45.2381	deletion
YPL240C	HSP82	95	43	45.2632	deletion
YDL154W	MSH5	95	43	45.2632	deletion
YCR012W	PGK1	95	43	45.2632	DAmP
YNR011C	PRP2	95	43	45.2632	DAmP
YOL159C-A	YOL159C-A	106	48	45.283	deletion
YJR076C	CDC11	106	48	45.283	DAmP
YOL141W	PPM2	106	48	45.283	deletion
YPR186C	PZF1	106	48	45.283	DAmP
YER162C	RAD4	106	48	45.283	deletion
YLR137W	RKM5	106	48	45.283	deletion
YBR191W	RPL21A	64	29	45.3125	deletion
YDR190C	RVB1	64	29	45.3125	DAmP
YER034W	YER034W	75	34	45.3333	deletion
YDR051C	DET1	75	34	45.3333	deletion
YAL022C	FUN26	75	34	45.3333	deletion
YIL020C	HIS6	75	34	45.3333	deletion
YBR107C	IML3	75	34	45.3333	deletion
YPL156C	PRM4	75	34	45.3333	deletion
YGL063W	PUS2	75	34	45.3333	deletion
YMR079W	SEC14	75	34	45.3333	DAmP
YDR089W	YDR089W	86	39	45.3488	deletion
YFR016C	YFR016C	86	39	45.3488	deletion
YLL029W	FRA1	86	39	45.3488	deletion
YNL255C	GIS2	86	39	45.3488	deletion
YMR195W	ICY1	86	39	45.3488	deletion
YFL005W	SEC4	86	39	45.3488	DAmP
YJL089W	SIP4	86	39	45.3488	deletion
YKL020C	SPT23	86	39	45.3488	deletion
YLR450W	HMG2	97	44	45.3608	deletion
YOR130C	ORT1	97	44	45.3608	deletion
YER128W	VFA1	97	44	45.3608	deletion
YLR312C-B	YLR312C-B	108	49	45.3704	deletion
YOL069W	NUF2	108	49	45.3704	DAmP
YGR292W	MAL12	119	54	45.3782	deletion
YER028C	MIG3	130	59	45.3846	deletion
YPL205C	YPL205C	77	35	45.4545	deletion
YOL037C	YOL037C	77	35	45.4545	deletion
YML083C	YML083C	88	40	45.4545	deletion
YPR147C	YPR147C	77	35	45.4545	deletion
YLR349W	YLR349W	77	35	45.4545	deletion
YDL118W	YDL118W	77	35	45.4545	deletion
YDL186W	YDL186W	88	40	45.4545	deletion
YDR101C	ARX1	66	30	45.4545	deletion
YDR361C	BCP1	110	50	45.4545	DAmP
YOR303W	CPA1	77	35	45.4545	deletion
YBL002W	HTB2	99	45	45.4545	deletion
YDR345C	HXT3	88	40	45.4545	deletion
YCR091W	KIN82	77	35	45.4545	deletion
YGR193C	PDX1	77	35	45.4545	deletion
YEL017C-A	PMP2	88	40	45.4545	deletion
YPR103W	PRE2	110	50	45.4545	DAmP
YDR255C	RMD5	77	35	45.4545	deletion
YPL090C	RPS6A	55	25	45.4545	deletion
YPR133C	SPN1	99	45	45.4545	DAmP
YCR073C	SSK22	77	35	45.4545	deletion
YOR212W	STE4	77	35	45.4545	deletion
YDR105C	TMS1	77	35	45.4545	deletion
YMR261C	TPS3	99	45	45.4545	deletion
YKL010C	UFD4	77	35	45.4545	deletion
YER064C	VHR2	88	40	45.4545	deletion
YBR104W	YMC2	99	45	45.4545	deletion
YGR169C-A	LSO2	123	56	45.5285	deletion
YJR068W	RFC2	123	56	45.5285	DAmP
YBR088C	POL30	112	51	45.5357	DAmP
YGR139W	YGR139W	101	46	45.5446	deletion
YHR177W	YHR177W	101	46	45.5446	deletion
YOL159C-A	YOL159C-A	101	46	45.5446	deletion
YPR044C	OPI11	101	46	45.5446	deletion
YPR089W	YPR089W	90	41	45.5556	deletion
YCR073W-A	SOL2	90	41	45.5556	deletion
YLR053C	YLR053C	79	36	45.5696	deletion
YMR187C	YMR187C	79	36	45.5696	deletion
YPR153W	YPR153W	79	36	45.5696	deletion
YLL004W	ORC3	79	36	45.5696	DAmP
YGL252C	RTG2	79	36	45.5696	deletion
YMR183C	SSO2	79	36	45.5696	deletion
YDR363W	ESC2	68	31	45.5882	deletion
YDR079C-A	TFB5	136	62	45.5882	deletion
YKL041W	VPS24	68	31	45.5882	deletion
YMR151W	YIM2	68	31	45.5882	deletion
YPR021C	AGC1	125	57	45.6	deletion
YER159C	BUR6	125	57	45.6	DAmP
YLR145W	RMP1	114	52	45.614	DAmP
YJL191W	RPS14B	114	52	45.614	deletion
YMR281W	GPI12	103	47	45.6311	DAmP
YJR131W	MNS1	103	47	45.6311	deletion
YDR026C	NSI1	103	47	45.6311	deletion
YNL062C	GCD10	92	42	45.6522	DAmP
YDR435C	PPM1	92	42	45.6522	deletion
YMR242C	RPL20A	46	21	45.6522	deletion
YER074W	RPS24A	92	42	45.6522	deletion
YHR167W	THP2	92	42	45.6522	deletion
YPL074W	YTA6	92	42	45.6522	deletion
YER175W-A	YER175W-A	127	58	45.6693	deletion
YCR010C	ADY2	81	37	45.679	deletion
YFR036W	CDC26	81	37	45.679	deletion
YDL208W	NHP2	81	37	45.679	DAmP
YOL084W	PHM7	81	37	45.679	deletion
YGL204W	#N/A	81	37	45.679	deletion
YOL089C	HAL9	116	53	45.6897	deletion
YCL043C	PDI1	116	53	45.6897	DAmP
YGL074C	YGL074C	70	32	45.7143	DAmP
YKL022C	CDC16	105	48	45.7143	DAmP
YJR048W	CYC1	105	48	45.7143	deletion
YPR138C	MEP3	70	32	45.7143	deletion
YLR024C	UBR2	70	32	45.7143	deletion
YNL266W	YNL266W	94	43	45.7447	deletion
YOL113W	SKM1	94	43	45.7447	deletion
YDR082W	STN1	94	43	45.7447	DAmP
YGR186W	TFG1	94	43	45.7447	DAmP
YNL146C-A	YNL146C-A	142	65	45.7746	deletion
YCL064C	CHA1	83	38	45.7831	deletion
YLR420W	URA4	83	38	45.7831	deletion
YGL138C	YGL138C	107	49	45.7944	deletion
YHR164C	DNA2	155	71	45.8065	DAmP
YHR112C	YHR112C	72	33	45.8333	deletion
YMR008C	PLB1	72	33	45.8333	deletion
YMR241W	YHM2	96	44	45.8333	deletion
YDR299W	BFR2	109	50	45.8716	DAmP
YBR299W	MAL32	109	50	45.8716	deletion
YAL033W	POP5	109	50	45.8716	DAmP
YGR137W	YGR137W	85	39	45.8824	deletion
YKL106W	AAT1	85	39	45.8824	deletion
YDR142C	PEX7	85	39	45.8824	deletion
YGR129W	SYF2	85	39	45.8824	deletion
YOR303W	CPA1	98	45	45.9184	deletion
YDL209C	CWC2	98	45	45.9184	DAmP
YLR113W	HOG1	98	45	45.9184	deletion
YPR123C	YPR123C	74	34	45.9459	deletion
YFL055W	AGP3	74	34	45.9459	deletion
YPL236C	ENV7	74	34	45.9459	deletion
YOL056W	GPM3	74	34	45.9459	deletion
YNL098C	RAS2	74	34	45.9459	deletion
YCR004C	YCP4	74	34	45.9459	deletion
YIL111W	COX5B	124	57	45.9677	deletion
YHL026C	YHL026C	87	40	45.977	deletion
YML054C	CYB2	87	40	45.977	deletion
YHL029C	OCA5	87	40	45.977	deletion
YER098W	UBP9	87	40	45.977	deletion
YOR376W-A	YOR376W-A	150	69	46	deletion
YHR111W	UBA4	50	23	46	deletion
YOL150C	YOL150C	113	52	46.0177	deletion
YOL013W-B	YOL013W-B	126	58	46.0317	deletion
YGR054W	YGR054W	76	35	46.0526	deletion
YBL019W	APN2	76	35	46.0526	deletion
YLR047C	FRE8	76	35	46.0526	deletion
YMR251W	GTO3	76	35	46.0526	deletion
YOL155C	HPF1	76	35	46.0526	deletion
YPL155C	KIP2	76	35	46.0526	deletion
YBL091C-A	SCS22	76	35	46.0526	deletion
YGR144W	THI4	76	35	46.0526	deletion
YMR034C	YMR034C	89	41	46.0674	deletion
YJL064W	YJL064W	89	41	46.0674	deletion
YAL058W	CNE1	89	41	46.0674	deletion
YPR091C	NVJ2	89	41	46.0674	deletion
YOL080C	REX4	89	41	46.0674	deletion
YMR302C	YME2	89	41	46.0674	deletion
YLR229C	CDC42	102	47	46.0784	DAmP
YNL061W	NOP2	102	47	46.0784	DAmP
YER181C	YER181C	115	53	46.087	deletion
YEL023C	YEL023C	78	36	46.1538	deletion
YNL303W	YNL303W	78	36	46.1538	deletion
YDR193W	YDR193W	78	36	46.1538	deletion
YMR102C	YMR102C	104	48	46.1538	deletion
YER187W	YER187W	104	48	46.1538	deletion
YBR145W	ADH5	78	36	46.1538	deletion
YDL029W	ARP2	104	48	46.1538	DAmP
YBR217W	ATG12	78	36	46.1538	deletion
YJL014W	CCT3	104	48	46.1538	DAmP
YLR323C	CWC24	91	42	46.1538	DAmP
YBR018C	GAL7	104	48	46.1538	deletion
YGR268C	HUA1	117	54	46.1538	deletion
YPL270W	MDL2	78	36	46.1538	deletion
YOR177C	MPC54	91	42	46.1538	deletion
YOR243C	PUS7	78	36	46.1538	deletion
YPL167C	REV3	78	36	46.1538	deletion
YEL065W	SIT1	91	42	46.1538	deletion
YLR250W	SSP120	78	36	46.1538	deletion
YLR212C	TUB4	104	48	46.1538	DAmP
YOR326W	MYO2	145	67	46.2069	DAmP
YFR031C	SMC2	119	55	46.2185	DAmP
YOL114C	YOL114C	106	49	46.2264	deletion
YER121W	YER121W	106	49	46.2264	deletion
YKL151C	YKL151C	93	43	46.2366	deletion
YFL013W-A	YFL013W-A	93	43	46.2366	deletion
YER036C	ARB1	93	43	46.2366	DAmP
YOR134W	BAG7	93	43	46.2366	deletion
YMR304C-A	YMR304C-A	80	37	46.25	deletion
YOL053W	AIM39	80	37	46.25	deletion
YBR203W	COS111	80	37	46.25	deletion
YMR162C	DNF3	80	37	46.25	deletion
YDR446W	ECM11	80	37	46.25	deletion
YKL220C	FRE2	80	37	46.25	deletion
YDR221W	GTB1	80	37	46.25	deletion
YIL164C	NIT1	80	37	46.25	deletion
YLL025W	PAU17	80	37	46.25	deletion
YBL092W	RPL32	80	37	46.25	DAmP
YGL181W	GTS1	121	56	46.281	deletion
YDL024C	DIA3	108	50	46.2963	deletion
YLR363C	NMD4	108	50	46.2963	deletion
YDL090C	RAM1	54	25	46.2963	deletion
YIL051C	MMF1	95	44	46.3158	DAmP
YMR105C	PGM2	95	44	46.3158	deletion
YDR509W	YDR509W	82	38	46.3415	deletion
YPR158W	CUR1	82	38	46.3415	deletion
YDR174W	HMO1	41	19	46.3415	deletion
YPL263C	KEL3	82	38	46.3415	deletion
YPL128C	TBF1	82	38	46.3415	DAmP
YKL174C	TPO5	82	38	46.3415	deletion
YDR059C	UBC5	82	38	46.3415	deletion
YML029W	USA1	82	38	46.3415	deletion
YCR032W	BPH1	110	51	46.3636	deletion
YDR173C	ARG82	69	32	46.3768	deletion
YLR044C	PDC1	69	32	46.3768	deletion
YML061C	PIF1	69	32	46.3768	deletion
YKR053C	YSR3	69	32	46.3768	deletion
YCR083W	TRX3	97	45	46.3918	deletion
YOR314W	YOR314W	84	39	46.4286	deletion
YCL026C	YCL026C	84	39	46.4286	deletion
YBR242W	YBR242W	84	39	46.4286	deletion
YJR148W	BAT2	84	39	46.4286	deletion
YDR196C	CAB5	112	52	46.4286	DAmP
YOR080W	DIA2	84	39	46.4286	deletion
YER179W	DMC1	112	52	46.4286	deletion
YGR264C	MES1	112	52	46.4286	DAmP
YGR263C	SAY1	112	52	46.4286	deletion
YAL011W	SWC3	84	39	46.4286	deletion
YIR039C	YPS6	84	39	46.4286	deletion
YDR033W	MRH1	99	46	46.4646	deletion
YLR164W	SHH4	99	46	46.4646	deletion
YEL035C	UTR5	99	46	46.4646	DAmP
YJL127C-B	YJL127C-B	142	66	46.4789	deletion
YJL088W	ARG3	71	33	46.4789	deletion
YIL116W	HIS5	71	33	46.4789	deletion
YJR118C	ILM1	142	66	46.4789	deletion
YOR017W	PET127	71	33	46.4789	deletion
YPL149W	ATG5	114	53	46.4912	deletion
YGR091W	PRP31	114	53	46.4912	DAmP
YFR030W	MET10	86	40	46.5116	deletion
YJL066C	MPM1	86	40	46.5116	deletion
YGR182C	YGR182C	101	47	46.5347	deletion
YOL097W-A	YOL097W-A	101	47	46.5347	deletion
YJR151W-A	YJR151W-A	101	47	46.5347	deletion
YHR176W	FMO1	101	47	46.5347	deletion
YCL052C	PBN1	101	47	46.5347	DAmP
YGR266W	YGR266W	116	54	46.5517	deletion
YOL088C	MPD2	116	54	46.5517	deletion
YDR034W-B	YDR034W-B	131	61	46.5649	deletion
YDL062W	YDL062W	73	34	46.5753	deletion
YEL027W	VMA3	73	34	46.5753	deletion
YGL259W	YPS5	73	34	46.5753	deletion
YLL032C	YLL032C	88	41	46.5909	deletion
YLR280C	YLR280C	88	41	46.5909	deletion
YML075C	HMG1	103	48	46.6019	deletion
YBR202W	MCM7	103	48	46.6019	DAmP
YDR003W-A	YDR003W-A	118	55	46.6102	deletion
YMR262W	YMR262W	90	42	46.6667	deletion
YLL056C	YLL056C	90	42	46.6667	deletion
YFR035C	YFR035C	75	35	46.6667	deletion
YGR012W	YGR012W	75	35	46.6667	deletion
YOR263C	YOR263C	90	42	46.6667	deletion
YER175W-A	YER175W-A	120	56	46.6667	deletion
YJL136W-A	YJL136W-A	105	49	46.6667	deletion
YGL159W	YGL159W	105	49	46.6667	deletion
YGR207C	CIR1	90	42	46.6667	deletion
YAL012W	CYS3	90	42	46.6667	deletion
YNL001W	DOM34	75	35	46.6667	deletion
YOL013C	HRD1	75	35	46.6667	deletion
YGR223C	HSV2	75	35	46.6667	deletion
YLR011W	LOT6	90	42	46.6667	deletion
YLR266C	PDR8	75	35	46.6667	deletion
YDR459C	PFA5	90	42	46.6667	deletion
YGL158W	RCK1	105	49	46.6667	deletion
YGR275W	RTT102	105	49	46.6667	deletion
YIR022W	SEC11	60	28	46.6667	DAmP
YDR145W	TAF12	105	49	46.6667	DAmP
YDL098C	SNU23	122	57	46.7213	DAmP
YOR218C	YOR218C	107	50	46.729	DAmP
YOR364W	YOR364W	92	43	46.7391	deletion
YHR046C	INM1	92	43	46.7391	deletion
YOR137C	SIA1	92	43	46.7391	deletion
YLR112W	YLR112W	77	36	46.7532	deletion
YDR336W	YDR336W	77	36	46.7532	deletion
YMR009W	ADI1	77	36	46.7532	deletion
YHR109W	CTM1	77	36	46.7532	deletion
YMR208W	ERG12	77	36	46.7532	DAmP
YKR009C	FOX2	77	36	46.7532	deletion
YNR049C	MSO1	77	36	46.7532	deletion
YLR387C	REH1	77	36	46.7532	deletion
YGL229C	SAP4	77	36	46.7532	deletion
YCL032W	STE50	77	36	46.7532	deletion
YOL124C	TRM11	77	36	46.7532	deletion
YGR094W	VAS1	77	36	46.7532	DAmP
YOR291W	YPK9	77	36	46.7532	deletion
YPL173W	MRPL40	62	29	46.7742	deletion
YNL229C	URE2	62	29	46.7742	deletion
YOL066C	RIB2	109	51	46.789	DAmP
YLR152C	YLR152C	94	44	46.8085	deletion
YAL029C	MYO4	94	44	46.8085	deletion
YNL113W	RPC19	94	44	46.8085	DAmP
YAR044W	YAR044W	79	37	46.8354	deletion
YOR248W	YOR248W	79	37	46.8354	deletion
YLR281C	YLR281C	79	37	46.8354	deletion
YGR134W	CAF130	79	37	46.8354	deletion
YLL009C	COX17	79	37	46.8354	deletion
YLR216C	CPR6	79	37	46.8354	deletion
YOL010W	RCL1	79	37	46.8354	DAmP
YJL036W	SNX4	79	37	46.8354	deletion
YMR105W-A	YMR105W-A	111	52	46.8468	deletion
YIL002W-A	YIL002W-A	111	52	46.8468	deletion
YCR075W-A	YCR075W-A	111	52	46.8468	deletion
YDL139C	SCM3	111	52	46.8468	DAmP
YJL067W	YJL067W	96	45	46.875	deletion
YLR170C	APS1	96	45	46.875	deletion
YHR031C	RRM3	96	45	46.875	deletion
YIL003W	CFD1	113	53	46.9027	DAmP
YGL154C	LYS5	113	53	46.9027	deletion
YLR457C	NBP1	113	53	46.9027	DAmP
YER079W	YER079W	81	38	46.9136	deletion
YGL032C	AGA2	81	38	46.9136	deletion
YDR063W	AIM7	81	38	46.9136	deletion
YDR421W	ARO80	81	38	46.9136	deletion
YIL124W	AYR1	81	38	46.9136	deletion
YKL176C	LST4	81	38	46.9136	deletion
YOR188W	MSB1	81	38	46.9136	deletion
YMR201C	RAD14	81	38	46.9136	deletion
YOR045W	TOM6	81	38	46.9136	deletion
YML001W	YPT7	81	38	46.9136	deletion
YLR165C	PUS5	98	46	46.9388	deletion
YFR004W	RPN11	98	46	46.9388	DAmP
YHR188C	GPI16	115	54	46.9565	DAmP
YDR253C	MET32	83	39	46.988	deletion
YPL207W	TYW1	83	39	46.988	deletion
YLR404W	FLD1	100	47	47	deletion
YPL072C	#N/A	100	47	47	deletion
YDR412W	RRP17	117	55	47.0085	DAmP
YDR426C	YDR426C	68	32	47.0588	deletion
YCL062W	YCL062W	68	32	47.0588	deletion
YAL045C	YAL045C	85	40	47.0588	deletion
YBR300C	YBR300C	85	40	47.0588	deletion
YMR001C-A	YMR001C-A	102	48	47.0588	deletion
YJL031C	BET4	102	48	47.0588	DAmP
YHR166C	CDC23	136	64	47.0588	DAmP
YPL160W	CDC60	102	48	47.0588	DAmP
YMR073C	IRC21	68	32	47.0588	deletion
YNL147W	LSM7	102	48	47.0588	deletion
YMR314W	PRE5	102	48	47.0588	DAmP
YJR059W	PTK2	102	48	47.0588	deletion
YMR194W	RPL36A	68	32	47.0588	deletion
YOR357C	SNX3	85	40	47.0588	deletion
YGL022W	STT3	85	40	47.0588	DAmP
YOR132W	VPS17	85	40	47.0588	deletion
YLL037W	YLL037W	104	49	47.1154	DAmP
YCL035C	GRX1	104	49	47.1154	deletion
YJL037W	IRC18	87	41	47.1264	deletion
YDR220C	YDR220C	70	33	47.1429	deletion
YPR012W	YPR012W	70	33	47.1429	deletion
YDR539W	FDC1	70	33	47.1429	deletion
YML048W	GSF2	70	33	47.1429	deletion
YDR122W	KIN1	70	33	47.1429	deletion
YOR321W	PMT3	70	33	47.1429	deletion
YDL059C	RAD59	70	33	47.1429	deletion
YPR135W	CTF4	53	25	47.1698	deletion
YIL046W	MET30	142	67	47.1831	DAmP
YOR131C	YOR131C	89	42	47.191	deletion
YAL040C	CLN3	89	42	47.191	deletion
YML074C	FPR3	89	42	47.191	deletion
YIL121W	QDR2	89	42	47.191	deletion
YPR151C	SUE1	89	42	47.191	deletion
YJL047C-A	YJL047C-A	125	59	47.2	deletion
YGL260W	YGL260W	72	34	47.2222	deletion
YPL028W	ERG10	108	51	47.2222	DAmP
YOR016C	ERP4	72	34	47.2222	deletion
YJR017C	ESS1	108	51	47.2222	DAmP
YJR091C	JSN1	72	34	47.2222	deletion
YMR131C	RRB1	108	51	47.2222	DAmP
YOR027W	STI1	72	34	47.2222	deletion
YGR189C	CRH1	91	43	47.2527	deletion
YMR222C	FSH2	91	43	47.2527	deletion
YLR099C	ICT1	91	43	47.2527	deletion
YGR073C	YGR073C	110	52	47.2727	DAmP
YOR278W	HEM4	110	52	47.2727	DAmP
YER096W	SHC1	110	52	47.2727	deletion
YKL053W	YKL053W	74	35	47.2973	deletion
YJL021C	YJL021C	74	35	47.2973	deletion
YDL085C-A	YDL085C-A	148	70	47.2973	deletion
YPL166W	ATG29	74	35	47.2973	deletion
YJL020C	BBC1	74	35	47.2973	deletion
YBL066C	SEF1	74	35	47.2973	deletion
YOR310C	NOP58	93	44	47.3118	DAmP
YLR336C	SGD1	93	44	47.3118	DAmP
YPR036W	VMA13	93	44	47.3118	deletion
YDR053W	YDR053W	112	53	47.3214	DAmP
YCR054C	CTR86	112	53	47.3214	DAmP
YMR229C	RRP5	112	53	47.3214	DAmP
YCL012W	YCL012W	76	36	47.3684	deletion
YCL002C	YCL002C	95	45	47.3684	deletion
YOR121C	YOR121C	76	36	47.3684	deletion
YLR198C	YLR198C	95	45	47.3684	DAmP
YLL052C	AQY2	95	45	47.3684	deletion
YJL008C	CCT8	76	36	47.3684	DAmP
YDR182W	CDC1	76	36	47.3684	DAmP
YOR112W	CEX1	76	36	47.3684	deletion
YPL241C	CIN2	95	45	47.3684	deletion
YPL172C	COX10	57	27	47.3684	deletion
YDR359C	EAF1	76	36	47.3684	deletion
YJR031C	GEA1	95	45	47.3684	deletion
YHR085W	IPI1	114	54	47.3684	DAmP
YMR285C	NGL2	76	36	47.3684	deletion
YPL233W	NSL1	114	54	47.3684	DAmP
YJL001W	PRE3	95	45	47.3684	DAmP
YNL201C	PSY2	76	36	47.3684	deletion
YLR136C	TIS11	95	45	47.3684	deletion
[truncated: 3,676 more rows]
